# Supplementary material for: Genome sequencing unveils a regulatory landscape of platelet reactivity
Source: PubMed Central journal article supplement (PMC8206369; doi:10.1038/s41467-021-23470-9), 2021-06-15

**Supplementary Table 1.** Platelet aggregation results were harmonized across the cohorts.  
 \* indicates Maximum aggregation to ADP/Epinephrine and \*\* indicates Lag time to Collagen.

| Phenotype | Agonist     | Framingham                          | GeneSTAR   | Amish      | Sample size |
|-----------|-------------|-------------------------------------|------------|------------|-------------|
| adp_low1  | ADP         | * 1µM                               | * 2µM      | * 2µM      | 3140        |
| adp_low2  | ADP         | * 3µM                               | * 2µM      | * 2µM      | 3229        |
| adp_low3  | ADP         | Threshold dose for >50% aggregation | * 2µM      | * 2µM      | 3014        |
| adp_high1 | ADP         | * 5µM                               | * 10µM     | * 5µM      | 2799        |
| adp_high2 | ADP         | * 5µM                               | * 10µM     | * 10µM     | 2799        |
| adp_high3 | ADP         | * 10µM                              | * 10µM     | * 10µM     | 1967        |
| adp_high4 | ADP         | Threshold dose for >50% aggregation | * 10µM     | * 10µM     | 3147        |
| epi_low1  | Epinephrine | * 0.5µM                             | * 2µM      | * 10µM     | 2962        |
| epi_low2  | Epinephrine | * 1µM                               | * 2µM      | * 10µM     | 3027        |
| epi_low3  | Epinephrine | * 3µM                               | * 2µM      | * 10µM     | 2486        |
| epi_low4  | Epinephrine | * 3µM                               | * 10µM     | * 10µM     | 2488        |
| epi_low5  | Epinephrine | Threshold dose for >50% aggregation | * 2µM      | * 10µM     | 3152        |
| epi_high1 | Epinephrine | * 5µM                               | * 10µM     | * 10µM     | 2098        |
| epi_high2 | Epinephrine | * 10µM                              | * 10µM     | * 10µM     | 2141        |
| epi_high3 | Epinephrine | Threshold dose for >50% aggregation | * 10µM     | * 10µM     | 3154        |
| col_low1  | Collagen    | ** 190 µg/mL                        | ** 1µg/mL  | ** 1µg/mL  | 3354        |
| col_low2  | Collagen    | ** 190 µg/mL                        | ** 2µg/mL  | ** 2µg/mL  | 3364        |
| col_high1 | Collagen    | ** 190 µg/mL                        | ** 5µg/mL  | ** 5µg/mL  | 3361        |
| col_high2 | Collagen    | ** 190 µg/mL                        | ** 10µg/mL | ** 10µg/mL | 3352        |

**Supplementary Table 2.** Demographics for participants included in genome-wide association analyses. Values given are % or mean  $\pm$  1 SD. FHS=Framingham Heart Study, Amish=Old Order Amish Study, GS=GeneSTAR, EA=European American, AA=African American.

| Characteristic                                                            | FHS<br>n=1,981                                                            | Amish<br>n=235                                           | GS EA<br>n=909                                        | GS AA<br>n=730                                         |
|---------------------------------------------------------------------------|---------------------------------------------------------------------------|----------------------------------------------------------|-------------------------------------------------------|--------------------------------------------------------|
| Male, %                                                                   | 47.15                                                                     | 48.94                                                    | 44.11                                                 | 36.71                                                  |
| Diabetes, %                                                               | 6.3                                                                       | 0.43                                                     | 5.19                                                  | 11.96                                                  |
| Hypertension, %                                                           | 35.34                                                                     | 5.96                                                     | 24.67                                                 | 39.25                                                  |
| Smoking, %                                                                | 17.47                                                                     | 8.94                                                     | 20.59                                                 | 31.85                                                  |
| Cardiovascular disease, %                                                 | 6.11                                                                      | 2.55                                                     | 1.1                                                   | 1.78                                                   |
| Aspirin response, %                                                       | 15.49                                                                     | 0                                                        | 0                                                     | 0                                                      |
| Age, years                                                                | 55.76 $\pm$ 9.2                                                           | 46.73 $\pm$ 13.6                                         | 44.5 $\pm$ 13.2                                       | 43.4 $\pm$ 12.4                                        |
| Body mass index, kg/m <sup>2</sup>                                        | 27.52 $\pm$ 4.9                                                           | 26.9 $\pm$ 4.4                                           | 28.7 $\pm$ 6.4                                        | 31.8 $\pm$ 8.1                                         |
| LDL cholesterol, mg/dl                                                    | 127.4 $\pm$ 32.8                                                          | 144.6 $\pm$ 44.8                                         | 124.8 $\pm$ 37.4                                      | 120.6 $\pm$ 38.9                                       |
| Fibrinogen, mg/dl                                                         | 308.0 $\pm$ 56.2                                                          | 281.9 $\pm$ 57.8                                         | 374.3 $\pm$ 113                                       | 417.3 $\pm$ 122                                        |
| Maximal aggregation to low ADP doses (%)                                  | 19.0 $\pm$ 21.5 (1uM)<br>67.8 $\pm$ 24.7(3uM)                             | 41.5 $\pm$ 22.5 (2uM)                                    | 44.6 $\pm$ 26.2 (2uM)                                 | 41.8 $\pm$ 28.6 (2uM)                                  |
| Maximal aggregation to high ADP doses (%)                                 | 77.4 $\pm$ 18.9 (5uM)<br>78.0 $\pm$ 19.5 (10uM)                           | 61.5 $\pm$ 18.4 (5uM)<br>67.5 $\pm$ 13.5 (10uM)          | 79.4 $\pm$ 13.3 (10uM)                                | 77.0 $\pm$ 17.3 (10uM)                                 |
| Threshold concentration (EC50) for 50% response to ADP ( $\mu$ M)         | 3.27 $\pm$ 1.5                                                            | NA                                                       | NA                                                    | NA                                                     |
| Maximal aggregation to low epinephrine doses (%)                          | 51.2 $\pm$ 31.0 (0.5uM)<br>58.2 $\pm$ 31.1 (1uM)<br>66.0 $\pm$ 28.4 (3uM) | 60.2 $\pm$ 27.1 (10uM)                                   | 56.1 $\pm$ 33.2 (2uM)                                 | 51.6 $\pm$ 36.0 (2uM)                                  |
| Maximal aggregation to high epinephrine doses (%)                         | 48.1 $\pm$ 28.6 (5uM)<br>34.8 $\pm$ 24.5 (10uM)                           | 60.2 $\pm$ 27.1 (10uM)                                   | 71.8 $\pm$ 27.2 (10uM)                                | 63.5 $\pm$ 34.1 (10uM)                                 |
| Threshold concentration (EC50) for 50% response to epinephrine ( $\mu$ M) | 1.92 $\pm$ 2.9                                                            | NA                                                       | NA                                                    | NA                                                     |
| Lag time to low collagen doses (seconds)                                  | 87.0 $\pm$ 25.2<br>(190ug/ml)                                             | 56.8 $\pm$ 24.9 (1ug/ml)<br>47.9 $\pm$ 17.5 (2ug/ml)     | 147.8 $\pm$ 87.6 (1ug/ml)<br>99.9 $\pm$ 57.5 (2ug/ml) | 158.1 $\pm$ 90.4 (1ug/ml)<br>111.5 $\pm$ 67.3 (2ug/ml) |
| Lag time to high collagen doses (seconds)                                 | 87.0 $\pm$ 25.2<br>(190ug/ml)                                             | 37.9 $\pm$ 12.1 (5ug/ml)<br>32.6 $\pm$ 10.5<br>(10ug/ml) | 68.8 $\pm$ 32.1 (5ug/ml)<br>60.5 $\pm$ 23.3 (10ug/ml) | 77.4 $\pm$ 40.8 (5ug/ml)<br>64.1 $\pm$ 26.4 (10ug/ml)  |

**Supplementary Table 3** Discovery and Replication results of the variants that drove the gene-based signals. The variants were identified through leave-one-out analysis. Replication was performed as a meta-analysis in order of FHS, GeneSTAR European Americans, GeneSTAR African Americans and OOA for direction of effect. P-values are from a two-sided score test with no adjustment for discovery and one sided Z test no adjustment for replication.

| Gene         | snpID hg38  | ref/alt | Phenotype | DISCOVERY |       |       |       |          | REPLICATION |      |        |         |
|--------------|-------------|---------|-----------|-----------|-------|-------|-------|----------|-------------|------|--------|---------|
|              |             |         |           | N         | MAF   | beta  | se    | p-value  | Direction   | N    | Zscore | p-value |
| <i>SVEP1</i> | 9:110549951 | G/C     | adp_low1  | 3140      | 0.029 | 0.338 | 0.075 | 5.84E-06 | +++?        | 1833 | 2.662  | 0.004   |
| <i>BCO1</i>  | 16:81290348 | G/C     | epi_low1  | 2962      | 0.007 | 0.719 | 0.147 | 1.05E-06 | --??        | 1195 | -0.575 | 0.717   |
| <i>IDH3A</i> | 15:78161708 | T/A     | col_high2 | 3352      | 0.006 | 0.742 | 0.153 | 1.20E-06 | --??        | 1510 | -1.012 | 0.844   |

**Supplementary Table 4:** Platelet aggregation results in the Caerphilly Prospective Study. Top, Lead variants and RGS18 genome-wide significant variants. Bottom, Variants driving gene-based SKAT. P-values are from a one-sided Z test with no adjustment for multiple-correction.

| snpID hg38   | rsID        | Ref/<br>Alt | minor<br>allele | MAF   | Rsq   | Trait: ADP (0.725uM) |        |       |          | Trait: Collagen (42.7 ug/mL) |          |       |          |
|--------------|-------------|-------------|-----------------|-------|-------|----------------------|--------|-------|----------|------------------------------|----------|-------|----------|
|              |             |             |                 |       |       | N                    | beta   | se    | p-value  | N                            | beta     | se    | p-value  |
| 1:156899922  | rs12041331  | G/A         | ALT             | 0.08  | 0.992 | 1177                 | -0.304 | 0.055 | 1.62E-08 | 811                          | -0.688   | 0.145 | 9.75E-07 |
| 1:192194880  | rs1175170   | G/C         | ALT             | 0.487 | 0.987 | 1177                 | 0.087  | 0.029 | 1.09E-03 | 811                          | 0.203    | 0.075 | 3.52E-03 |
| 1:20567949   | rs12137738  | A/T         | ALT             | 0.108 | 0.961 | 1177                 | -0.014 | 0.046 | 6.20E-01 | 811                          | -0.02    | 0.126 | 5.64E-01 |
| 1:67128641   | rs142001088 | C/T         | ALT             | 0.023 | 0.887 | 1177                 | -0.04  | 0.100 | 6.56E-01 | 811                          | -0.5     | 0.259 | 9.73E-02 |
| 10:111139289 | rs7097060   | T/A         | ALT             | 0.188 | 0.988 | 1177                 | -0.046 | 0.038 | 1.11E-01 | 811                          | -0.074   | 0.100 | 2.31E-01 |
| 11:92185065  | rs183146849 | A/T         | ALT             | 0.019 | 0.863 | 1177                 | 0.094  | 0.110 | 8.02E-01 | 811                          | -0.444   | 0.297 | 9.33E-01 |
| 12:132589485 | rs140148392 | G/A         | ALT             | 0.014 | 0.934 | 1177                 | 0.144  | 0.123 | 8.79E-01 | 811                          | 0.506    | 0.322 | 9.42E-01 |
| 13:96912429  | rs61974290  | A/G         | ALT             | 0.067 | 0.963 | 1177                 | 0.011  | 0.057 | 5.79E-01 | 811                          | -0.054   | 0.151 | 6.40E-01 |
| 5:19109993   | rs112157462 | T/C         | ALT             | 0.028 | 0.892 | 1177                 | 0.063  | 0.092 | 7.53E-01 | 811                          | -0.259   | 0.260 | 1.59E-01 |
| 6:121921871  | rs58250884  | A/G         | ALT             | 0.052 | 0.997 | 1177                 | -0.024 | 0.065 | 3.58E-01 | 811                          | 0.126    | 0.180 | 7.59E-01 |
| 1:192139135  | rs12070423  | A/G         | ALT             | 0.496 | 0.983 | 1177                 | 0.093  | 0.029 | 6.08E-04 | 811                          | 0.239    | 0.076 | 8.29E-04 |
| 1:192140500  | rs10801100  | T/A         | ALT             | 0.496 | 0.985 | 1177                 | 0.093  | 0.029 | 5.95E-04 | 811                          | 0.239    | 0.076 | 7.93E-04 |
| 1:192141301  | rs7546592   | A/C         | ALT             | 0.496 | 0.985 | 1177                 | 0.093  | 0.029 | 5.91E-04 | 811                          | 0.239    | 0.076 | 7.96E-04 |
| 1:192144114  | rs10801102  | G/A         | ALT             | 0.479 | 0.986 | 1177                 | 0.095  | 0.029 | 4.82E-04 | 811                          | 0.221    | 0.076 | 1.81E-03 |
| 1:192148472  | rs6687273   | C/T         | ALT             | 0.495 | 0.994 | 1177                 | 0.093  | 0.029 | 6.08E-04 | 811                          | 0.233    | 0.075 | 9.91E-04 |
| 1:192154581  | rs7526348   | A/G         | ALT             | 0.495 | 0.998 | 1177                 | 0.093  | 0.029 | 5.68E-04 | 811                          | 0.235    | 0.075 | 9.03E-04 |
| 1:192168015  | rs10754003  | T/A         | ALT             | 0.493 | 0.993 | 1177                 | 0.096  | 0.029 | 3.85E-04 | 811                          | 0.235    | 0.075 | 8.86E-04 |
| 1:192174246  | rs12117018  | T/G         | ALT             | 0.48  | 0.992 | 1177                 | 0.092  | 0.029 | 5.95E-04 | 811                          | 0.205    | 0.075 | 3.17E-03 |
| 1:192182044  | rs1937235   | A/C         | ALT             | 0.487 | 0.989 | 1177                 | 0.088  | 0.029 | 1.05E-03 | 811                          | 0.203    | 0.075 | 3.54E-03 |
| 1:192183215  | rs10921107  | C/A         | ALT             | 0.473 | 0.989 | 1177                 | 0.088  | 0.029 | 1.03E-03 | 811                          | 0.183    | 0.075 | 7.42E-03 |
| 1:192186870  | rs2247567   | T/C         | ALT             | 0.473 | 0.989 | 1177                 | 0.088  | 0.029 | 1.05E-03 | 811                          | 0.183    | 0.075 | 7.42E-03 |
| 1:192186916  | rs2247566   | G/A         | ALT             | 0.471 | 0.988 | 1177                 | 0.088  | 0.029 | 1.00E-03 | 811                          | 0.18     | 0.076 | 8.67E-03 |
| 1:192193726  | rs1175168   | T/C         | ALT             | 0.472 | 0.988 | 1177                 | 0.088  | 0.029 | 1.06E-03 | 811                          | 0.184    | 0.075 | 7.34E-03 |
| 1:192193819  | rs1175169   | T/C         | ALT             | 0.487 | 0.988 | 1177                 | 0.088  | 0.029 | 1.07E-03 | 811                          | 0.204    | 0.075 | 3.40E-03 |
| 1:192194880  | rs1175170   | G/C         | ALT             | 0.487 | 0.987 | 1177                 | 0.087  | 0.029 | 1.09E-03 | 811                          | 0.203    | 0.075 | 3.52E-03 |
| 1:192195284  | rs1175171   | T/C         | ALT             | 0.487 | 0.987 | 1177                 | 0.087  | 0.029 | 1.09E-03 | 811                          | 0.203    | 0.075 | 3.54E-03 |
| 1:192206244  | rs12037701  | C/T         | REF             | 0.49  | 0.982 | 1177                 | -0.087 | 0.028 | 1.08E-03 | 811                          | -0.15    | 0.075 | 2.25E-02 |
| snpID hg38   | rsID        | REF         | minor<br>allele | MAF   | Rsq   | N                    | beta   | Se    | p-value  | Gene                         | Trait    |       |          |
| 9:110549951  | rs61751937  | G/C         | ALT             | 0.018 | 0.999 | 1177                 | 0.251  | 0.104 | 7.98E-03 | SVEP1                        | ADP      |       |          |
| 16:81290348  | rs143238312 | G/C         | ALT             | 0.013 | 0.989 | 1177                 | 0.245  | 0.128 | 2.74E-02 | BCO1                         | ADP      |       |          |
| 16:81290348  | rs143238312 | G/C         | ALT             | 0.013 | 0.989 | 1183                 | 0.365  | 0.163 | 1.27E-02 | BCO1                         | Thrombin |       |          |



**Supplementary Table 5a.** Comparison of results from previous Hapmap study and current TOPMed study for the five previously identified variants not replicated in current study. P-values are from a two-sided score test with no adjustment for multiple testing for the Mega analysis and two-sided Z test for other analyses. \*: percentage (in %) of TOPMed sample size overlapped in corresponding Hapmap sample size. For example, FHS has N=1350 for adp\_high4 in TOPMed and 1258 of them are in Hapmap FHS (N=2372), 1258/2372=53%. \*\* Hapmap Meta used sample size weighted approach that only reports Z statistic instead of beta and se.

| chr:pos (hg38) | rsID       | ref/alt | Phenotype<br>(see Table S1) | Analysis     | N (%)*     | MAF   | beta     | se    | p-value  |
|----------------|------------|---------|-----------------------------|--------------|------------|-------|----------|-------|----------|
| 11:10647681    | rs7940646  | T/C     | adp_high2                   | TOPMed Mega  | 2799       | 0.273 | -0.122   | 0.031 | 9.90E-05 |
|                |            |         |                             | TOPMed Meta  | 2799       | 0.27  | -3.763** | -     | 1.68E-04 |
|                |            |         |                             | TOPMed Amish | 234 (0%)   | 0.476 | -0.071   | 0.1   | 4.76E-01 |
|                |            |         |                             | TOPMed FHS   | 1002 (52%) | 0.312 | -0.129   | 0.051 | 1.05E-02 |
|                |            |         |                             | TOPMed GS_EA | 887 (72%)  | 0.309 | -0.148   | 0.053 | 5.19E-03 |
|                |            |         |                             | TOPMed GS_AA | 676 (0%)   | 0.083 | -0.097   | 0.105 | 3.57E-01 |
|                |            |         |                             | Hapmap Meta  | 3030       | 0.314 | -5.61**  | -     | 2.03E-08 |
|                |            |         |                             | Hapmap FHS   | 1803       | 0.312 | -0.03    | 0.007 | 1.58E-05 |
|                |            |         |                             | Hapmap GS_EA | 1227       | 0.318 | -2.145   | 0.582 | 2.45E-04 |
| 7:155968169    | rs2363910  | T/G     | adp_high4                   | TOPMed Mega  | 3147       | 0.09  | -0.161   | 0.046 | 4.59E-04 |
|                |            |         |                             | TOPMed Meta  | 3147       | 0.09  | -3.375** | -     | 7.39E-04 |
|                |            |         |                             | TOPMed Amish | 234 (0%)   | 0.017 | -0.077   | 0.359 | 8.31E-01 |
|                |            |         |                             | TOPMed FHS   | 1350 (53%) | 0.077 | -0.147   | 0.071 | 3.92E-02 |
|                |            |         |                             | TOPMed GS_EA | 887 (72%)  | 0.097 | -0.228   | 0.084 | 6.67E-03 |
|                |            |         |                             | TOPMed GS_AA | 676 (0%)   | 0.131 | -0.099   | 0.088 | 2.57E-01 |
|                |            |         |                             | Hapmap Meta  | 3482       | 0.078 | -5.47**  | -     | 4.50E-08 |
|                |            |         |                             | Hapmap FHS   | 2372       | 0.071 | -0.043   | 0.013 | 6.10E-04 |
|                |            |         |                             | Hapmap GS_EA | 1110       | 0.092 | -4.518   | 0.955 | 2.59E-06 |
| 10:63306426    | rs10761741 | G/T     | epi_low5                    | TOPMed Mega  | 3152       | 0.402 | 0.106    | 0.026 | 5.61E-05 |
|                |            |         |                             | TOPMed Meta  | 3152       | 0.402 | 4.021**  | -     | 5.80E-05 |
|                |            |         |                             | TOPMed Amish | 235 (0%)   | 0.462 | -0.089   | 0.098 | 3.65E-01 |
|                |            |         |                             | TOPMed FHS   | 1343 (53%) | 0.41  | 0.157    | 0.038 | 3.62E-05 |
|                |            |         |                             | TOPMed GS_EA | 896 (72%)  | 0.425 | 0.101    | 0.051 | 4.63E-02 |
|                |            |         |                             | TOPMed GS_AA | 678 (0%)   | 0.335 | 0.067    | 0.061 | 2.72E-01 |
|                |            |         |                             | Hapmap Meta  | 3602       | 0.417 | 5.653**  | -     | 1.57E-08 |
|                |            |         |                             | Hapmap FHS   | 2364       | 0.415 | 0.082    | 0.017 | 1.47E-06 |
|                |            |         |                             | Hapmap GS_EA | 1238       | 0.422 | 4.053    | 1.31  | 2.04E-03 |
| 7:106724153    | rs342286   | A/G     | epi_low5                    | TOPMed Mega  | 3152       | 0.359 | -0.137   | 0.027 | 4.04E-07 |
|                |            |         |                             | TOPMed Meta  | 3152       | 0.359 | -4.351** | -     | 1.35E-05 |
|                |            |         |                             | TOPMed Amish | 235 (0%)   | 0.262 | -0.126   | 0.11  | 2.52E-01 |
|                |            |         |                             | TOPMed FHS   | 1343 (53)  | 0.439 | -0.141   | 0.037 | 1.55E-04 |
|                |            |         |                             | TOPMed GS_EA | 896 (72%)  | 0.449 | -0.163   | 0.049 | 8.15E-04 |
|                |            |         |                             | TOPMed GS_AA | 678 (0%)   | 0.114 | 0.041    | 0.09  | 6.43E-01 |
|                |            |         |                             | Hapmap Meta  | 3602       | 0.435 | -5.925** | -     | 3.12E-09 |
|                |            |         |                             | Hapmap FHS   | 2364       | 0.441 | -0.086   | 0.017 | 4.15E-07 |
|                |            |         |                             | Hapmap GS_EA | 1238       | 0.422 | -4.472   | 1.388 | 1.32E-03 |
| 19:55014977    | rs1671152  | T/G     | col_low2                    | TOPMed Mega  | 3364       | 0.188 | -0.161   | 0.033 | 1.04E-06 |
|                |            |         |                             | TOPMed Meta  | 3364       | 0.188 | -5.283** | -     | 1.27E-07 |
|                |            |         |                             | TOPMed Amish | 234 (0%)   | 0.252 | -0.048   | 0.111 | 6.66E-01 |
|                |            |         |                             | TOPMed FHS   | 1551 (51)  | 0.146 | -0.301   | 0.052 | 6.27E-09 |
|                |            |         |                             | TOPMed GS_EA | 899 (73%)  | 0.152 | -0.119   | 0.069 | 8.40E-02 |
|                |            |         |                             | TOPMed GS_AA | 680 (0%)   | 0.309 | -0.047   | 0.063 | 4.62E-01 |

| chr:pos (hg38) | rsID | ref/alt | Phenotype<br>(see Table<br>S1) | Analysis     | N (%)* | MAF   | beta     | se    | p-value  |
|----------------|------|---------|--------------------------------|--------------|--------|-------|----------|-------|----------|
|                |      |         |                                | Hapmap Meta  | 3472   | 0.148 | -7.238** | -     | 4.57E-13 |
|                |      |         |                                | Hapmap FHS   | 2310   | 0.142 | -0.033   | 0.004 | 9.11E-14 |
|                |      |         |                                | Hapmap GS EA | 1162   | 0.159 | -0.017   | 0.008 | 3.71E-02 |

**Supplementary Table 5b.** Comparison of results from previous study and current study for RGS18 variant (rs1175170). P-values are from a two-sided score test with no adjustment for multiple testing for the Mega analysis and two-sided Z test for other analyses. \*: percentage (in %) of TOPMed sample size overlapped in corresponding Hapmap sample size. For example, FHS has N=1350 for adp\_high4 in TOPMed and 1258 of them are in Hapmap FHS (N=2372), 1258/2372=53%. \*\* Hapmap Meta used sample size weighted approach that only reports Z statistic instead of beta and se.

| chr:pos<br>(hg38) | rsID      | ref/alt | Phenotype<br>(see Table<br>S1) | Analysis     | N (%)*     | MAF   | beta    | se    | p-value  |
|-------------------|-----------|---------|--------------------------------|--------------|------------|-------|---------|-------|----------|
| 1:192194880       | rs1175170 | G/C     | epi_low5                       | TOPMed Mega  | 3152       | 0.446 | 0.155   | 0.026 | 1.96E-09 |
|                   |           |         |                                | TOPMed Meta  | 3152       | 0.44  | 6.002** | -     | 1.95E-09 |
|                   |           |         |                                | TOPMed Amish | 235 (0%)   | 0.394 | 0.201   | 0.098 | 3.92E-02 |
|                   |           |         |                                | TOPMed FHS   | 1343 (53%) | 0.478 | 0.161   | 0.037 | 1.47E-05 |
|                   |           |         |                                | TOPMed GS_EA | 896 (72%)  | 0.488 | 0.101   | 0.049 | 4.01E-02 |
|                   |           |         |                                | TOPMed GS_AA | 678 (0%)   | 0.316 | 0.2     | 0.061 | 1.08E-03 |
|                   |           |         |                                | Hapmap Meta  | 3602       | 0.493 | 4.365** | -     | 1.27E-05 |
|                   |           |         |                                | Hapmap FHS   | 2364       | 0.485 | 0.065   | 0.017 | 1.36E-04 |
|                   |           |         |                                | Hapmap GS_EA | 1238       | 0.492 | 3.357   | 1.494 | 2.49E-02 |

**Supplementary Table 6:** Co-localization between all transcripts having a platelet eQTL p-value <0.0031(0.05/16) within +/- 20KB of GWAS locus peak. Meaningful co-localization was noted between PEAR1 and RGS18 for Chr1:156899922 and Chr1:192194880 loci, respectively. Posterior probabilities for the H4 hypotheses from the Bayesian model is presented for the target gene.

| Locus        | Phenotype (see Table S1) | Co-localization by gene (posterior probability in %) |
|--------------|--------------------------|------------------------------------------------------|
| 1:20567949   | epi_low3                 | NBPF3 (9.54%)                                        |
| 1:67128641   | col_high1                | SLC35D1 (0.629%)                                     |
| 1:156899922  | adp_low1                 | LMNA (2.64%), <b>PEAR1 (99.6%)</b> ,                 |
| 1:156899922  | col_high1                | LMNA (2.64%), <b>PEAR1 (99.6%)</b>                   |
| 1:156899922  | epi_low1                 | LMNA (2.64%), <b>PEAR1 (99.6%)</b>                   |
| 1:192194880  | adp_high1                | <b>RGS18 (69.7%)</b>                                 |
| 1:192194880  | epi_low5                 | <b>RGS18 (69.0%)</b>                                 |
| 5:19109993   | col_high1                | -                                                    |
| 6:121921871  | epi_low2                 | -                                                    |
| 9:28873884   | epi_low2                 | -                                                    |
| 10:75490891  | col_high2                | -                                                    |
| 10:111139289 | epi_high3                | ADRA2A (34.5%)                                       |
| 11:92185065  | adp_high2                | -                                                    |
| 12:132589485 | col_high2                | ANKLE2 (0.0818%), FBRSL1 (0.115%)                    |
| 13:96912429  | epi_high1                | -                                                    |
| 17:21960955  | epi_low5                 | -                                                    |
| 17:21960955  | adp_low3                 | -                                                    |
| 17:16451482  | col_low2                 | LLRC75A-AS1 (1.67%)                                  |
| 18:29059923  | col_low2                 | -                                                    |
| 20:50142397  | col_high2                | BCAS4 (0.369%)                                       |

**Supplementary Table 7:** The BioVU Biobank and UKBB PheWAS were queried for the 5 driver variants of the gene based signals of SVEP1, BCO1, NELFA and IDH3A identified by SKAT (**Supplementary Table 10**). The PheWAS query was limited to blood and cardiovascular traits as described in the methods. There were a total of 71 PheCodes, and each was looked up in African American (AA) and European American (EA) PheWAS from the BioVU Biobank, and UKBB as a whole. All PheCodes with a  $p < 0.05$  are listed in the table, and within each locus PheCodes are sorted by p-value. P-values are from a two-sided score test with no adjustment for multiple testing.

| LOCUS<br>(SNV_Effect<br>allele) | PheCode                                              | Description                                                   | BioVU  |         |         |            |                     | UKBB                |        |         |         |            |                     |
|---------------------------------|------------------------------------------------------|---------------------------------------------------------------|--------|---------|---------|------------|---------------------|---------------------|--------|---------|---------|------------|---------------------|
|                                 |                                                      |                                                               | OR     | p-value | N cases | N controls | allele<br>frequency | BioVU<br>Population | OR     | p-value | N cases | N controls | allele<br>frequency |
| BCO1<br>(rs143238312_C)         | 433.12                                               | Cerebral atherosclerosis                                      |        |         |         |            |                     |                     | 4.055  | 0.003   | 224     | 399017     | 1.30%               |
|                                 | 578.2                                                | Blood in stool                                                | 0.557  | 0.047   | 899     | 17882      | 1.10%               | EA                  |        |         |         |            |                     |
|                                 | 635                                                  | Hemorrhage during pregnancy;<br>childbirth and postpartum     | 5.941  | 0.0012  | 37      | 22941      | 1.20%               | EA                  |        |         |         |            |                     |
|                                 | 818                                                  | Intracranial hemorrhage (injury)                              | 1.797  | 0.033   | 327     | 22278      | 1.20%               | EA                  |        |         |         |            |                     |
|                                 | 818.1                                                | Subdural hemorrhage (injury)                                  | 2.006  | 0.042   | 187     | 22282      | 1.20%               | EA                  |        |         |         |            |                     |
|                                 | 430.2                                                | Intracerebral hemorrhage                                      |        |         |         |            |                     |                     | 1.649  | 0.039   | 700     | 399017     | 1.30%               |
| SVEP1<br>(rs61751937_C)         | 443.9                                                | Peripheral vascular disease, unspecified                      |        |         |         |            |                     |                     | 1.310  | 0.0015  | 2566    | 400595     | 2.90%               |
|                                 | 443                                                  | Peripheral vascular disease                                   |        |         |         |            |                     | 1.197               | 0.0088 | 3927    | 400595  | 2.90%      |                     |
|                                 | 578.2                                                | Blood in stool                                                |        |         |         |            |                     | 1.221               | 0.017  | 2639    | 385157  | 2.90%      |                     |
|                                 | 444                                                  | Arterial embolism and thrombosis                              | 6.144  | 0.0055  | 48      | 4449       | 0.54%               | AA                  | 1.391  | 0.018   | 921     | 400595     | 2.90%               |
|                                 | 444.1                                                | Arterial embolism and thrombosis of<br>lower extremity artery |        |         |         |            |                     | 1.522               | 0.018  | 557     | 400595  | 2.90%      |                     |
|                                 | 433                                                  | Cerebrovascular disease                                       |        |         |         |            |                     | 1.116               | 0.02   | NA      | NA      | 2.90%      |                     |
|                                 | 433.11                                               | Occlusion of cerebral arteries, with<br>cerebral infarction   | 0.184  | 0.017   | 184     | 17494      | 2.70%               | EA                  | 1.116  | 0.02    | NA      | NA         | 2.90%               |
|                                 | 433.2                                                | Occlusion of cerebral arteries                                | 2.887  | 0.036   | 166     | 4432       | 0.57%               | AA                  |        |         |         |            |                     |
|                                 |                                                      | Cerebral artery occlusion, with<br>cerebral infarction        | 3.218  | 0.022   | 150     | 4432       | 0.57%               | AA                  |        |         |         |            | 2.90%               |
|                                 | 433.21                                               | Hematuria                                                     |        |         |         |            |                     |                     | 1.080  | 0.023   | 16409   | 379936     | 2.90%               |
|                                 | 593                                                  | Hematuria                                                     |        |         |         |            |                     |                     | 1.284  | 0.032   | 1324    | 400595     | 2.90%               |
|                                 | 818                                                  | Intracranial hemorrhage (injury)                              | 7.597  | 0.0084  | 33      | 5040       | 0.52%               | AA                  | 1.077  | 0.044   | 14921   | 377103     | 0.85%               |
| 440                             | Atherosclerosis                                      |                                                               |        |         |         |            |                     |                     |        |         |         |            |                     |
| 411.8                           | Other chronic ischemic heart disease,<br>unspecified |                                                               |        |         |         |            |                     |                     |        |         |         |            |                     |
| IDH3A<br>(rs61752770_A)         | 452.2                                                | Deep vein thrombosis (DVT)                                    | 1.644  | 0.046   | 789     | 15863      | 1.75%               | EA                  |        |         |         |            |                     |
|                                 | 593.1                                                | Gross Hematuria                                               | 17.486 | 0.023   | 35      | 3482       | 0.09%               | AA                  |        |         |         |            |                     |
|                                 | 850                                                  | Hemorrhage or hematoma complicating<br>a procedure            |        |         |         |            |                     |                     | 0.771  | 0.017   | 5329    | 394929     |                     |

**Supplementary Table 8:** Annotation of genome-wide significant variants in RGS18 locus. Annotation evidence for megakaryocyte (MK) elements arbitrarily labeled to indicate four independent enhancer regions (e11 – e14) falling within a common super enhancer (se11). P-values are from a two-sided score test with no adjustment for multiple testing for trait and from a linear model with no adjustment for multiple testing for eQTLs.

| snpID hg38       | MAF   | Lowest P value for Trait |          |          | Encode Regulatory |              | MK specific Regulatory |                | Platelet RGS18 eQTL |     |          |
|------------------|-------|--------------------------|----------|----------|-------------------|--------------|------------------------|----------------|---------------------|-----|----------|
|                  |       | ADP                      | COL      | EPI      | DNase             | TFBS Cluster | Enhancer               | Super Enhancer | Beta                | Var | P-value  |
| 1:192139135:A:G  | 0.456 | 1.16E-05                 | 4.42E-02 | 2.51E-08 | Yes               | GATA1        | .                      | .              | 0.06                | 0   | 3.13E-02 |
| 1:192140500:T:A  | 0.43  | 3.54E-06                 | 2.54E-02 | 2.17E-08 | Yes               | .            | .                      | .              | 0.06                | 0   | 3.13E-02 |
| 1:192141301:A:C  | 0.43  | 2.55E-06                 | 2.51E-02 | 1.81E-08 | No                | .            | .                      | .              | 0.06                | 0   | 3.13E-02 |
| 1:192142107:T:TG | 0.466 | 1.56E-05                 | 5.81E-02 | 1.45E-08 | No                | .            | .                      | .              | .                   | .   | .        |
| 1:192144114:G:A  | 0.437 | 3.34E-06                 | 8.53E-02 | 4.57E-08 | No                | .            | .                      | .              | 0.06                | 0   | 2.71E-02 |
| 1:192148472:C:T  | 0.465 | 1.17E-05                 | 4.08E-02 | 1.55E-08 | Yes               | FOS CEBPB    | e11                    | se11           | 0.06                | 0   | 3.13E-02 |
| 1:192154581:A:G  | 0.449 | 2.79E-06                 | 3.57E-02 | 1.79E-08 | Yes               | .            | e12                    | se11           | 0.06                | 0   | 3.18E-02 |
| 1:192168015:T:A  | 0.445 | 9.49E-06                 | 4.20E-02 | 6.98E-09 | Yes               | CTCF         | e13                    | se11           | 0.06                | 0   | 2.73E-02 |
| 1:192174246:T:G  | 0.41  | 5.36E-07                 | 5.55E-02 | 2.76E-08 | No                | .            | e14                    | se11           | 0.07                | 0   | 1.40E-02 |
| 1:192182044:A:C  | 0.443 | 1.81E-05                 | 3.71E-02 | 4.88E-09 | No                | .            | .                      | .              | 0.08                | 0   | 2.29E-03 |
| 1:192183215:C:A  | 0.406 | 1.14E-06                 | 5.63E-02 | 3.67E-08 | No                | .            | .                      | .              | 0.08                | 0   | 1.83E-03 |
| 1:192186870:T:C  | 0.405 | 2.02E-06                 | 5.64E-02 | 2.37E-08 | Yes               | .            | .                      | .              | 0.08                | 0   | 1.83E-03 |
| 1:192186916:G:A  | 0.405 | 9.19E-07                 | 6.08E-02 | 4.61E-08 | Yes               | .            | .                      | .              | 0.09                | 0   | 1.01E-03 |
| 1:192193726:T:C  | 0.407 | 1.11E-06                 | 5.35E-02 | 1.84E-08 | No                | .            | .                      | .              | 0.08                | 0   | 1.83E-03 |
| 1:192193819:T:C  | 0.424 | 3.79E-06                 | 3.76E-02 | 6.05E-09 | No                | .            | .                      | .              | 0.08                | 0   | 2.29E-03 |
| 1:192194880:G:C  | 0.442 | 7.86E-06                 | 2.37E-02 | 1.96E-09 | Yes               | .            | .                      | .              | 0.08                | 0   | 2.29E-03 |
| 1:192195284:T:C  | 0.443 | 1.23E-05                 | 3.47E-02 | 2.34E-09 | No                | .            | .                      | .              | 0.08                | 0   | 2.38E-03 |
| 1:192206244:C:T  | 0.441 | 5.94E-07                 | 1.32E-02 | 6.63E-09 | Yes               | E2F1         | .                      | .              | 0.06                | 0   | 9.15E-03 |

**Supplementary Table 9:** Epigenetic annotation results underlying platelet SNP selection for functional enhancer activity screens with transcription factor overexpression as well as summary results of assay screens.

| Locus                                                                                                                                                                                                                                                                                                                                                                                                                                                                                                                                                                                                                                                                                                                                                                                                                                                                                                                                                                                                                                                                                                                                                                                                                                         | SNPId      | Luciferase screen result                                                                                      | SNPchr:pos:alleles | minP (platelet agg traits) | K562 TFBS                                                                                                                                                                                                                                                                                                                                                                                          | ATAC-Seq (MKS)* | ENC_DNase | hot_MK | ENCODE TFBS (all cell types)                                      | Superenhancer MK (Blueprint) | H3K27ac_MK (Blueprint)** | H3K4me3_MK (Blueprint)** | H3K4me3_prom (promoter bound in MKs) |
|-----------------------------------------------------------------------------------------------------------------------------------------------------------------------------------------------------------------------------------------------------------------------------------------------------------------------------------------------------------------------------------------------------------------------------------------------------------------------------------------------------------------------------------------------------------------------------------------------------------------------------------------------------------------------------------------------------------------------------------------------------------------------------------------------------------------------------------------------------------------------------------------------------------------------------------------------------------------------------------------------------------------------------------------------------------------------------------------------------------------------------------------------------------------------------------------------------------------------------------------------|------------|---------------------------------------------------------------------------------------------------------------|--------------------|----------------------------|----------------------------------------------------------------------------------------------------------------------------------------------------------------------------------------------------------------------------------------------------------------------------------------------------------------------------------------------------------------------------------------------------|-----------------|-----------|--------|-------------------------------------------------------------------|------------------------------|--------------------------|--------------------------|--------------------------------------|
| PEAR1                                                                                                                                                                                                                                                                                                                                                                                                                                                                                                                                                                                                                                                                                                                                                                                                                                                                                                                                                                                                                                                                                                                                                                                                                                         | rs12041331 | Insufficient enhancer activity                                                                                | 1:156899 922:G:A   | 2.31E-18                   | NRF1, NRF1                                                                                                                                                                                                                                                                                                                                                                                         | .               | 239       | .      | .                                                                 | chr1.156865800.mkse          | .                        | .                        | .                                    |
| PEAR1                                                                                                                                                                                                                                                                                                                                                                                                                                                                                                                                                                                                                                                                                                                                                                                                                                                                                                                                                                                                                                                                                                                                                                                                                                         | rs12566888 | Insufficient enhancer activity                                                                                | 1:156899 255:G:T   | 5.73E-14                   | BCOR, KDM1A, KDM1A, ZMYM3                                                                                                                                                                                                                                                                                                                                                                          | .               | 371       | .      | POLR2A                                                            | chr1.156865800.mkse          | 2                        | .                        | .                                    |
| PEAR1                                                                                                                                                                                                                                                                                                                                                                                                                                                                                                                                                                                                                                                                                                                                                                                                                                                                                                                                                                                                                                                                                                                                                                                                                                         | rs12086222 | Insufficient enhancer activity                                                                                | 1:156899 838:G:C   | 2.17E-07                   | .                                                                                                                                                                                                                                                                                                                                                                                                  | .               | 239       | .      | .                                                                 | chr1.156865800.mkse          | 1                        | .                        | .                                    |
| PEAR1                                                                                                                                                                                                                                                                                                                                                                                                                                                                                                                                                                                                                                                                                                                                                                                                                                                                                                                                                                                                                                                                                                                                                                                                                                         | rs822442   | No allele-specific or TF (CTCF) effect in HEK293 or K562 cells                                                | 1:156913 423:C:A   | 3.07E-06                   | ARID1B, ARNT, ATF3, ATF7, CBFA2T3, CTBP1, CTCF, DPFE2, GATAD2A, HDAC1, HDAC1, HNRNP1, KDM1A, LEF1, MAX, MGA, MLLT1, MNT, MTA2, MYNN, NBN, NCOR1, NFXL1, NR2F1, NRF1, NRF1, POLR2A, RB1, RBFOX2, RNF2, RNF2, SKIL, SMARCA4, ZEB2, eGFP-ATF1, eGFP-DIDO1, eGFP-E2F5, eGFP-ETV1, eGFP-FOSL1, eGFP-VEZF1, eGFP-ZBTB11, eGFP-ZNF395, DPFE2, HDAC2, L3MBTL2, PKNOX1, POLR2G, ZEB2, eGFP-ZFX, eGFP-ZNF148 | 5               | 692       | .      | ZNF263, MAZ, ZBTB7A, SAP30, CTCF, E2F6, RAD21, POLR2A, HMG3, PHF8 | chr1.156865800.mkse          | .                        | 1                        | .                                    |
| RGS18                                                                                                                                                                                                                                                                                                                                                                                                                                                                                                                                                                                                                                                                                                                                                                                                                                                                                                                                                                                                                                                                                                                                                                                                                                         | rs1175170  | Insufficient enhancer activity                                                                                | 1:192194 880:G:C   | 1.96E-09                   | .                                                                                                                                                                                                                                                                                                                                                                                                  | .               | .         | .      | .                                                                 | .                            | .                        | .                        | .                                    |
| RGS18                                                                                                                                                                                                                                                                                                                                                                                                                                                                                                                                                                                                                                                                                                                                                                                                                                                                                                                                                                                                                                                                                                                                                                                                                                         | rs10754003 | No allele-specific or TF (CTCF) effect in HEK293 or K562 cells                                                | 1:192168 015:T:A   | 6.98E-09                   | .                                                                                                                                                                                                                                                                                                                                                                                                  | .               | 693       | 2      | CTCF                                                              | chr1.192116200.mkse          | 4                        | .                        | .                                    |
| RGS18                                                                                                                                                                                                                                                                                                                                                                                                                                                                                                                                                                                                                                                                                                                                                                                                                                                                                                                                                                                                                                                                                                                                                                                                                                         | rs6687273  | No allele-specific or TF (CEBPB) effect in HEK293. Reduction of enhancer activity with T allele in K562 cells | 1:192148 472:C:T   | 1.55E-08                   | eGFP-NFE2                                                                                                                                                                                                                                                                                                                                                                                          | 8               | 1000      | 2      | FOS, CEBPB                                                        | chr1.192116200.mkse          | 2                        | .                        | .                                    |
| RGS18                                                                                                                                                                                                                                                                                                                                                                                                                                                                                                                                                                                                                                                                                                                                                                                                                                                                                                                                                                                                                                                                                                                                                                                                                                         | rs12070423 | G allele reduces enhancer activity in GATA1 overexpressing HEK293 and K562 cells                              | 1:192139 135:A:G   | 2.51E-08                   | .                                                                                                                                                                                                                                                                                                                                                                                                  | .               | .         | .      | GATA1                                                             | .                            | .                        | .                        | .                                    |
| RGS18                                                                                                                                                                                                                                                                                                                                                                                                                                                                                                                                                                                                                                                                                                                                                                                                                                                                                                                                                                                                                                                                                                                                                                                                                                         | rs4495675  | G allele reduces enhancer activity in NFE2 overexpressing HEK293 and K562 cells                               | 1:192158 507:T:G   | 8.30E-08                   | NFE2, TEAD4, eGFP-CEBPB, eGFP-CEBPG                                                                                                                                                                                                                                                                                                                                                                | 8               | .         | 2      | POLR2A, SPI1, BATF                                                | chr1.192116200.mkse          | 4                        | 2                        | NM_130782                            |
| ADRA2A                                                                                                                                                                                                                                                                                                                                                                                                                                                                                                                                                                                                                                                                                                                                                                                                                                                                                                                                                                                                                                                                                                                                                                                                                                        | rs7097060  | No allele-specific or TF (FOSL1) effect in HEK293 or K562 cells                                               | 10:11113 9289:T:A  | 6.68E-12                   | eGFP-FOSL1                                                                                                                                                                                                                                                                                                                                                                                         | .               | .         | .      | .                                                                 | .                            | .                        | .                        | .                                    |
| ADRA2A                                                                                                                                                                                                                                                                                                                                                                                                                                                                                                                                                                                                                                                                                                                                                                                                                                                                                                                                                                                                                                                                                                                                                                                                                                        | rs10885088 | Insufficient enhancer activity                                                                                | 10:11111 449:A:G   | 2.06E-11                   | .                                                                                                                                                                                                                                                                                                                                                                                                  | 8               | 1000      | 4      | POLR2A                                                            | chr10.112872600.mkse         | 2                        | 1                        | .                                    |
| ADRA2A                                                                                                                                                                                                                                                                                                                                                                                                                                                                                                                                                                                                                                                                                                                                                                                                                                                                                                                                                                                                                                                                                                                                                                                                                                        | rs7079429  | Insufficient enhancer activity                                                                                | 10:11112 3099:T:C  | 2.75E-10                   | .                                                                                                                                                                                                                                                                                                                                                                                                  | .               | .         | .      | .                                                                 | chr10.112872600.mkse         | .                        | .                        | .                                    |
| ADRA2A                                                                                                                                                                                                                                                                                                                                                                                                                                                                                                                                                                                                                                                                                                                                                                                                                                                                                                                                                                                                                                                                                                                                                                                                                                        | rs12161672 | Insufficient enhancer activity                                                                                | 10:11112 7713:C:G  | 4.95E-10                   | ARID1B, CBFA2T2, CBFA2T3, NCOR1, NCOR1, NR2F2, STAT5A, TAL1, TAL1, TCF12, TEAD4, TRIM24, eGFP-VEZF1, eGFP-ZNF589                                                                                                                                                                                                                                                                                   | 8               | 621       | 6      | GATA2, POLR2A, STAT5A, TEAD4, NR2F2, GATA1, TAL1                  | chr10.112872600.mkse         | .                        | 1                        | .                                    |
| <p>Column heading descriptions.</p> <p>Locus = major gene in region under study</p> <p>SNP = Platelet aggregator associated SNP</p> <p>Luciferase assay results = summary of attempted enhancer activity assays</p> <p>Chr:pos:allele1:allele2 = location/major/minor alleles</p> <p>minP (platelet aggregation traits) = lowest observed p-value for platelet aggregation traits in the GWAS</p> <p>K562 TFBS = annotation of overlap of variants with 304 TF datasets from ENCODE K562 cells</p> <p>ATAC-seq MKS = overlap with megakaryocyte ATAC-seq peaks in Blueprint</p> <p>ENC_DNase = stringent definition of DNase cluster across all cell types</p> <p>hot_MK = DNase hotspot peaks in megakaryocytes</p> <p>ENCODE TFBS = overlapping TF clusters across all ENCODE cell types</p> <p>Superenhancer_MK = overlapping superenhancer in megakaryocytes</p> <p>H3K27ac_MK = overlapping H3K27ac peak in megakaryocytes</p> <p>H3K4me3_MK = overlapping H3K4me3 peak in megakaryocytes</p> <p>H3K4me3_bound = transcript with bound H3K4me3 overlapping promoter peak in megakaryocytes</p> <p>* total number of clones displaying open chromatin in the region in MKs</p> <p>** total number of samples with overlapping feature</p> |            |                                                                                                               |                    |                            |                                                                                                                                                                                                                                                                                                                                                                                                    |                 |           |        |                                                                   |                              |                          |                          |                                      |

**Supplementary Table 10:** Aggregated rare deleterious coding variants of 4 genes (SVEP1, BCO1, NELFA and IDH3A) were associated with platelet aggregation after Bonferroni correction ( $0.05 / 17744 = 2.819E-6$ ) by SKAT with MAF threshold 0.05. P-values are from a two-sided score test with no adjustment for multiple testing.

| <b>Gene</b>  | <b>Chr</b> | <b>Start</b> | <b>Stop</b> | <b># variants</b> | <b>p-value</b> | <b>Phenotype (see<br/>Supplemetnary<br/>Table 1</b> |
|--------------|------------|--------------|-------------|-------------------|----------------|-----------------------------------------------------|
| <i>SVEP1</i> | 9          | 110365251    | 110579880   | 64                | 2.64E-06       | adp_low1                                            |
| <i>BCO1</i>  | 16         | 81238448     | 81291142    | 27                | 8.88E-07       | epi_low1                                            |
| <i>NELFA</i> | 4          | 1982714      | 2041903     | 11                | 1.70E-06       | col_high1                                           |
| <i>IDH3A</i> | 15         | 78131498     | 78171949    | 10                | 2.40E-06       | col_high2                                           |



**Supplementary Table 11:** Annotation of 5 variants driving signals of SVEP1, BCO1, NELFA and IDH3A identified by SKAT gene-based test with MAF threshold 0.05.

| Chr:pos     | Ref/Alt | Gene  | AA Change | dbSNP       | SIFT | P2 HVAR | LRT | Mutation Taster | Meta SVM | M-CAP | CADD  | REVEL |
|-------------|---------|-------|-----------|-------------|------|---------|-----|-----------------|----------|-------|-------|-------|
| 16:81290348 | G/C     | BCO1  | p.G472A   | rs143238312 | D    | D       | D   | D               | D        | .     | 25.2  | 0.875 |
| 9:110549951 | G/C     | SVEP1 | p.R229G   | rs61751937  | D    | D       | D   | D               | D        | .     | 28.3  | 0.672 |
| 4:1986122   | T/C     | NELFA | p.K287R   | rs150291014 | T    | B       | N   | D               | T        | D     | 15.89 | 0.062 |
| 4:1987948   | G/A     | NELFA | p.R213W   | rs763817905 | D    | D       | D   | D               | D        | D     | 35    | 0.457 |
| 15:78161708 | T/A     | IDH3A | p.D139E   | rs61752770  | D    | P       | D   | D               | T        | D     | 24.7  | 0.208 |

**Supplementary Table 12.** Oligonucleotides used in functional experiments.

| qRT-PCR      | Assay ID           | Probe          | Company          |
|--------------|--------------------|----------------|------------------|
| POLR2A       | Hs.PT.58.25515089  | FAM            | IDT-DNA          |
| NRF1         | Hs.PT.58.19519028  | FAM            | IDT-DNA          |
| CTCF         | Hs.PT.58.27300879  | FAM            | IDT-DNA          |
| FOSL1        | Hs.PT.58.2855727   | FAM            | IDT-DNA          |
| GATA1        | Hs.PT.58.21050378  | FAM            | IDT-DNA          |
| GATA2        | Hs.PT.58.961996    | FAM            | IDT-DNA          |
| CEBPB        | Hs.PT.58.27185099  | FAM            | IDT-DNA          |
| NFE2         | Hs.PT.58.50438577  | FAM            | IDT-DNA          |
| Beta-Actin   | Hs.PT.39a.22214847 | HEX            | IDT-DNA          |
| PGL3 vectors |                    |                |                  |
| Gene         | Wildtype           | SNPs           | SNP-ID           |
| RGS18        | rs1175170 (G)      | rs1175170 (C)  | 1:192194880:G:C  |
| RGS18        | rs10754003 (T)     | rs10754003 (A) | 1:192168015:T:A  |
| RGS18        | rs6687273 (C)      | rs6687273 (T)  | 1:192148472:C:T  |
| RGS18        | rs12070423 (A)     | rs12070423 (G) | 1:192139135:A:G  |
| RGS18        | rs4495675 (T)      | rs4495675 (G)  | 1:192158507:T:G  |
| ADRA2A       | rs7097060 (T)      | rs7097060 (A)  | 10:111139289:T:A |
| ADRA2A       | rs10885088 (A)     | rs10885088 (G) | 10:111114449:A:G |
| ADRA2A       | rs7079429 (T)      | rs7079429 (C)  | 10:111123099:T:C |
| ADRA2A       | rs12161672 (C)     | rs12161672 (G) | 10:111127713:C:G |
| PEAR1        | rs12041331 (G)     | rs12041331 (A) | 1:156899922:G:A  |
| PEAR1        | rs12086222 (G)     | rs12086222 (C) | 1:156899838:G:C  |
| PEAR1        | rs12566888 (G)     | rs12566888 (T) | 1:156899255:G:T  |
| PEAR1        | rs822442 (C)       | rs822442 (A)   | 1:156913423:C:A  |

## Supplementary Figure 1. Manhattan plots and Quantile-Quantile (QQ) plots of platelet aggregation phenotypes.

**Supplementary Figure 1.** Manhattan plots and Quantile-Quantile (QQ) plots of platelet aggregation in response to different doses of Epinephrine, ADP and Collagen as described in Supplementary Table 1. Genome-wide association study for platelet aggregation in 3,855 individuals. P-values, expressed as  $-\log_{10}(P)$ , are plotted according to physical genomic locations by chromosome. Loci passing genome wide significance ( $5 \times 10^{-8}$ ) are marked by red dots. Locus names represent the nearest annotated gene. P-values are from a two-sided score test with no adjustment for multiple testing. The blue horizontal line indicates a p-value threshold of  $1 \times 10^{-6}$  corresponding to suggestive significance threshold. The red horizontal line indicates p-value threshold of  $5 \times 10^{-8}$ , corresponding to genome-wide significance.

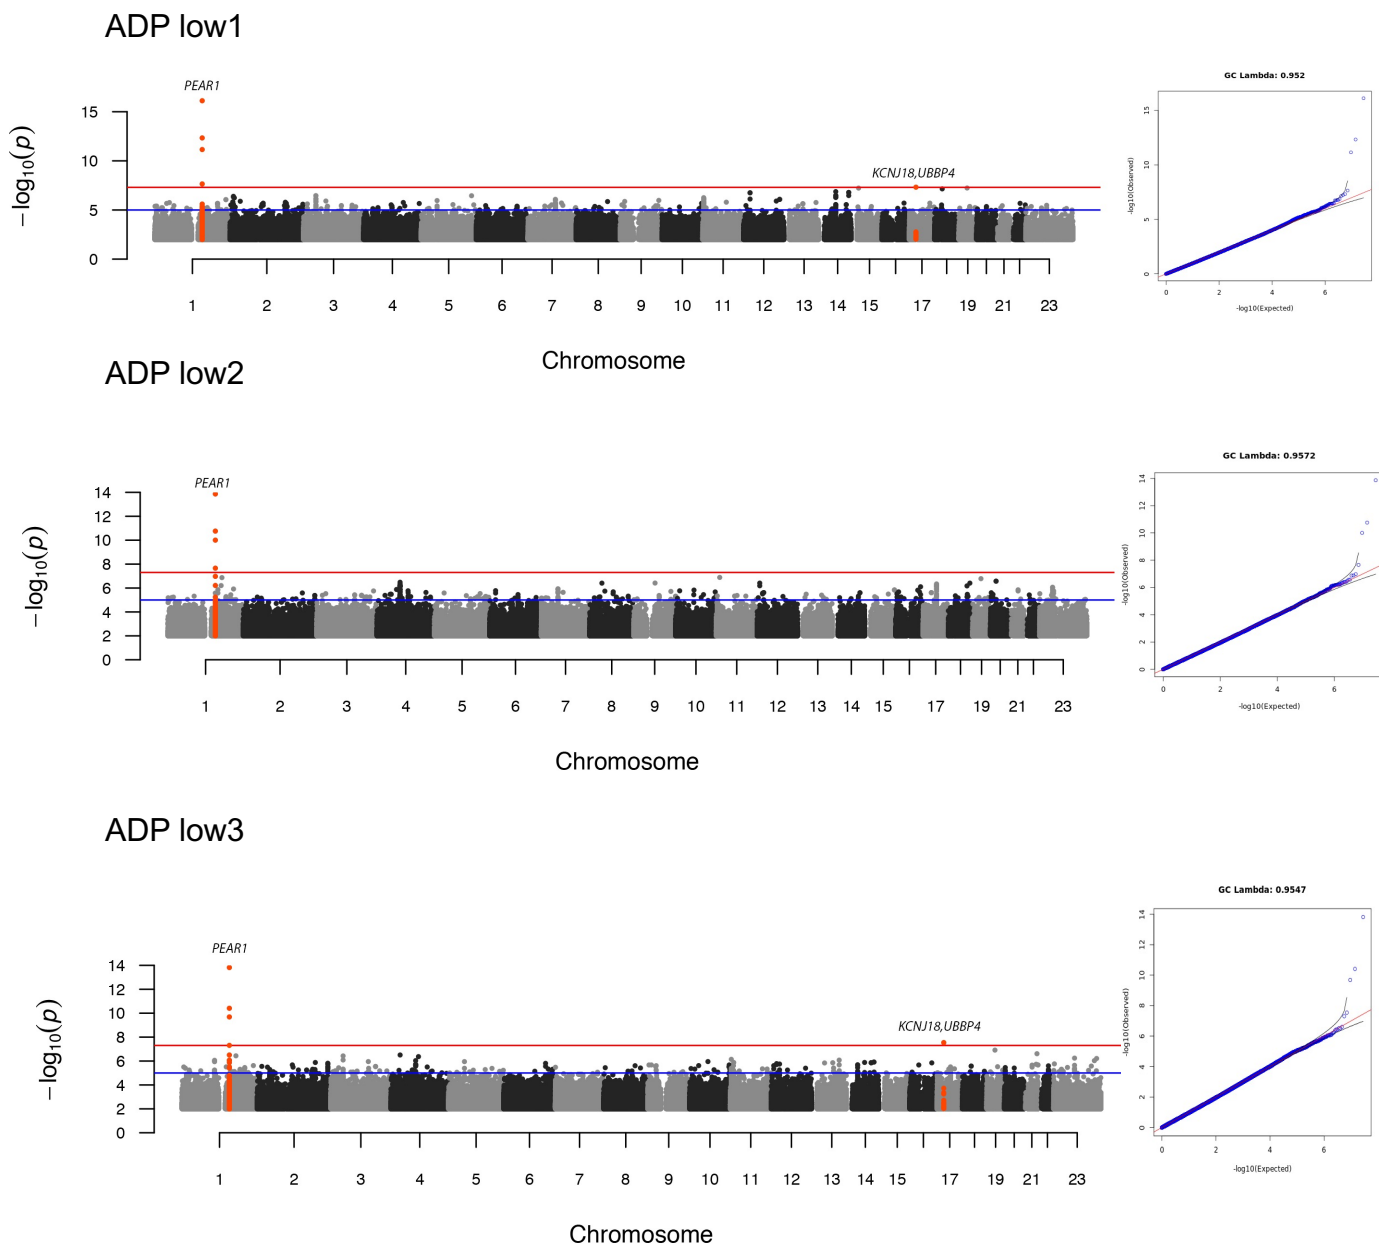

# Supplementary Figure 1 continued.

## ADP high1

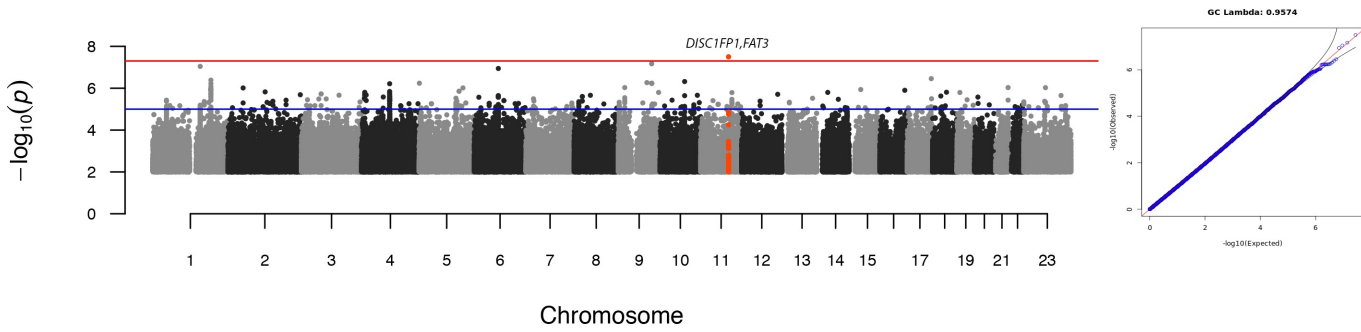

## ADP high2

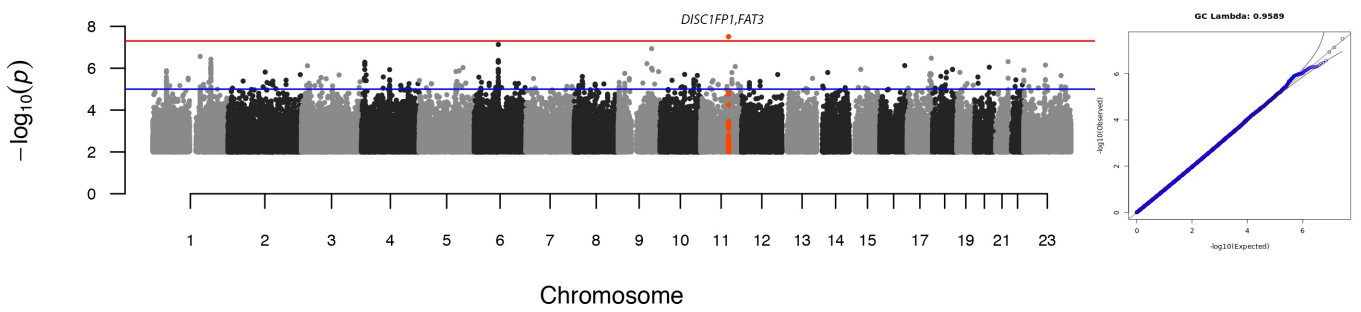

## ADP high3

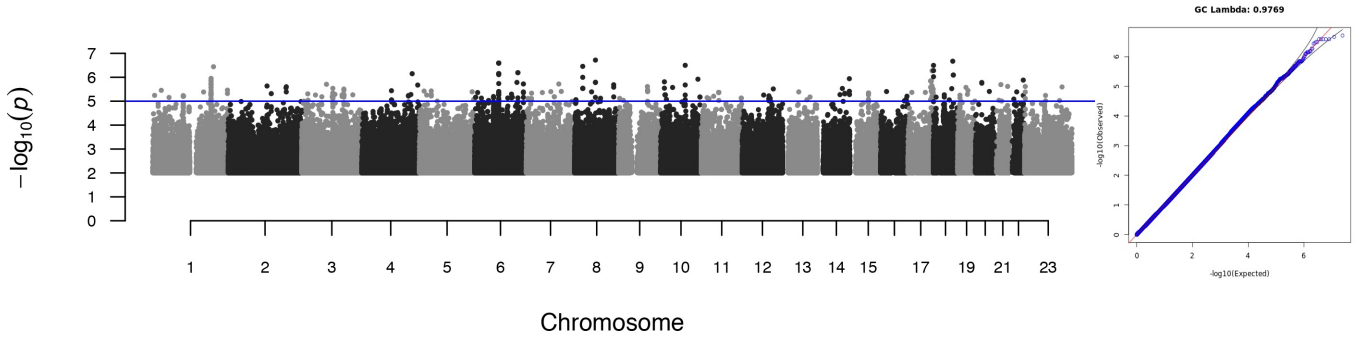

## ADP high4

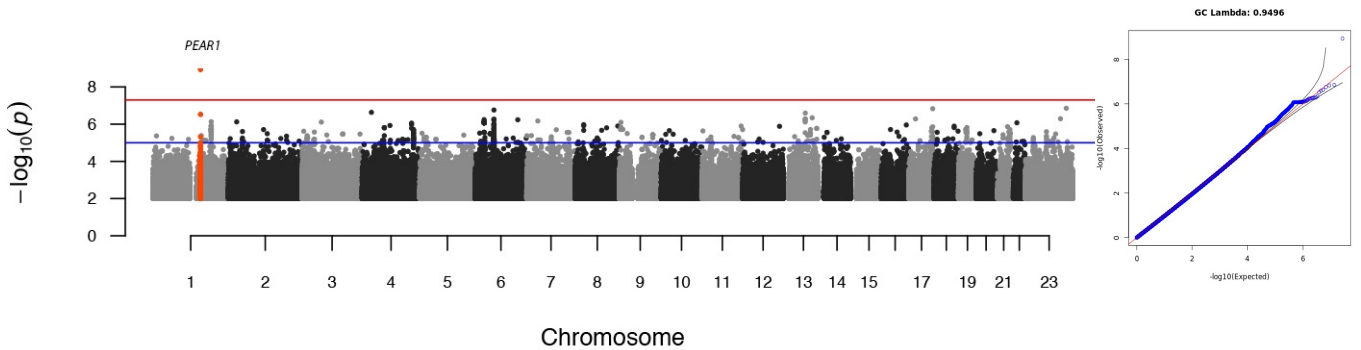

# Supplementary Figure 1 continued.

## Collagen low1

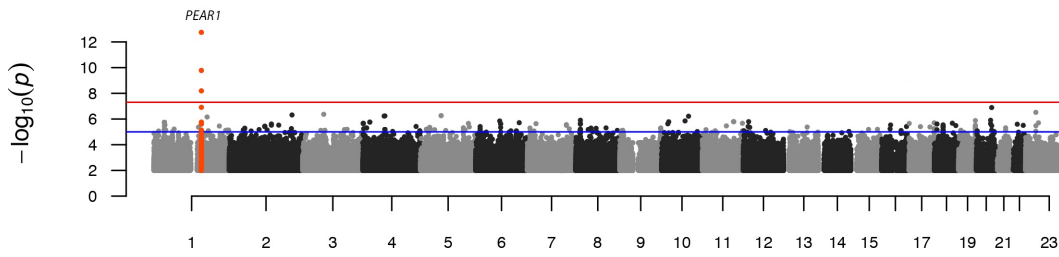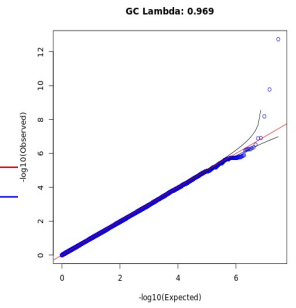

## Collagen low2

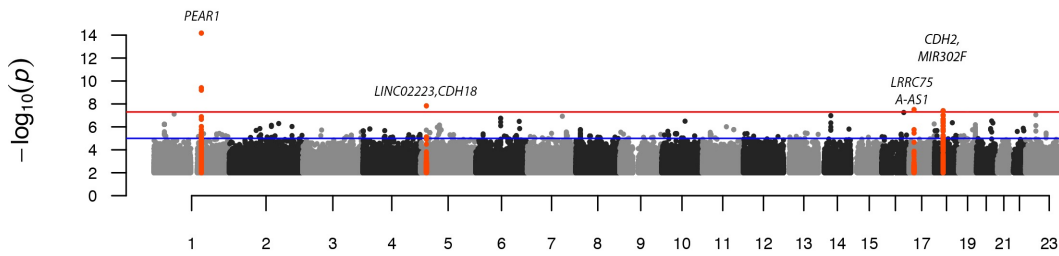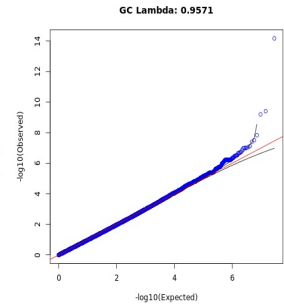

## Collagen high1

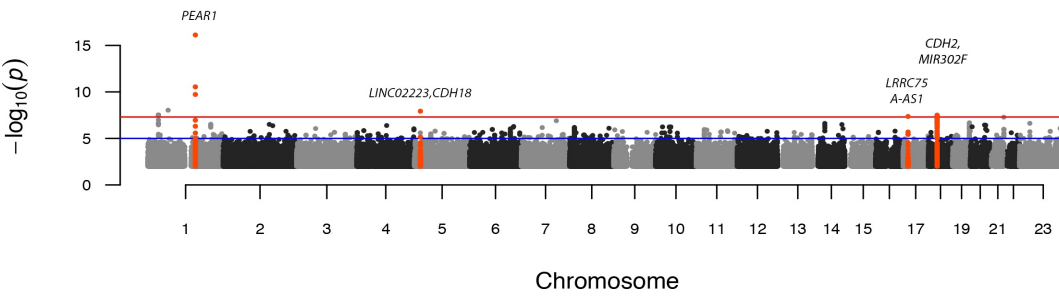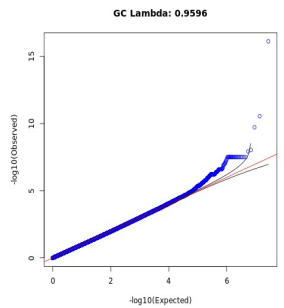

## Collagen high2

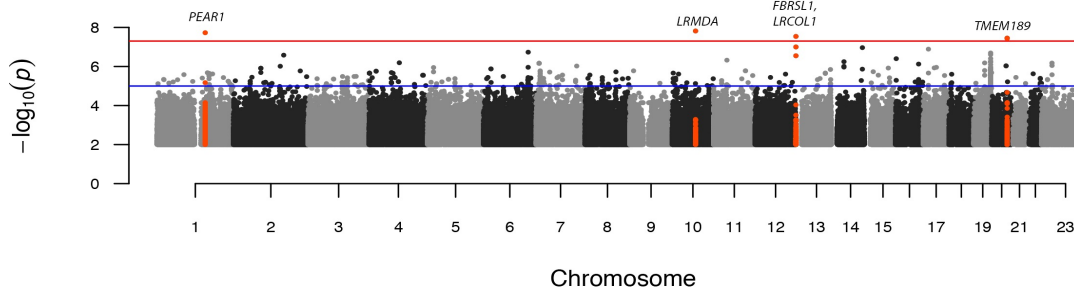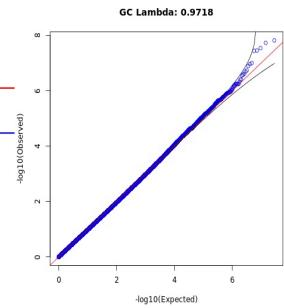

# Supplementary Figure 1 continued.

## Epinephrine low1

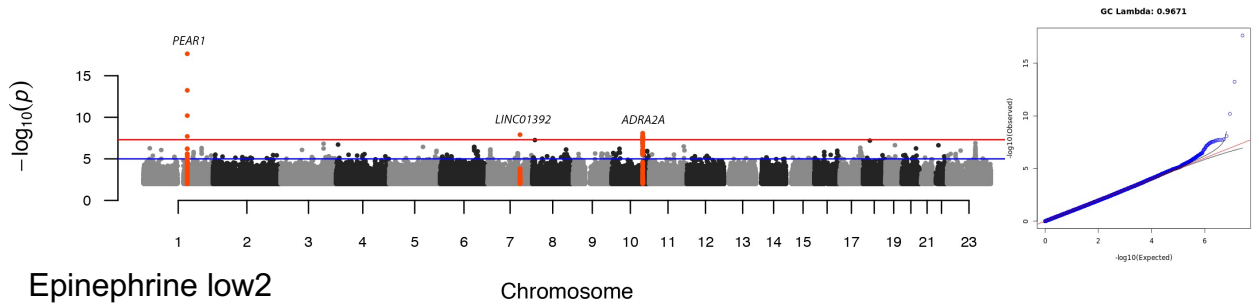

## Epinephrine low2

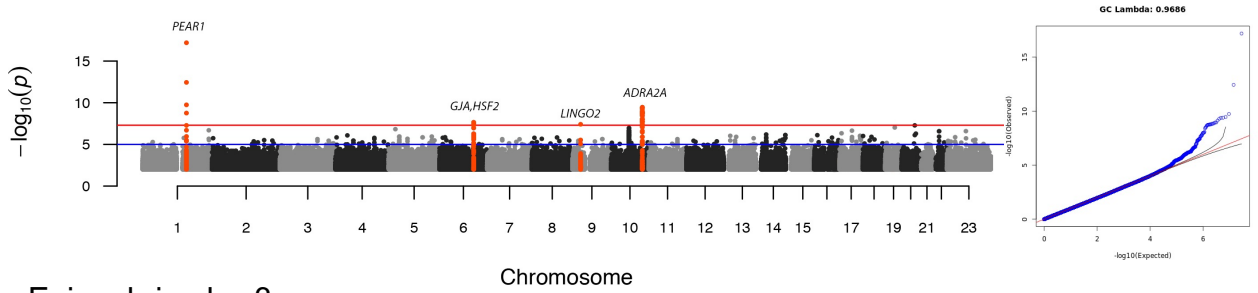

## Epinephrine low3

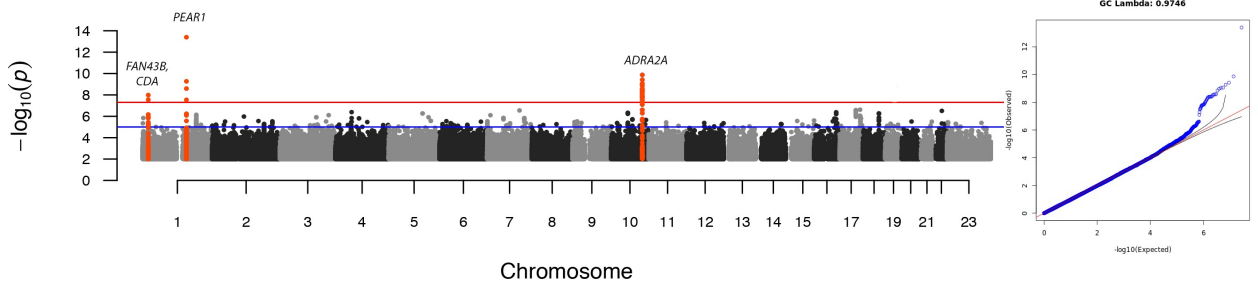

## Epinephrine low4

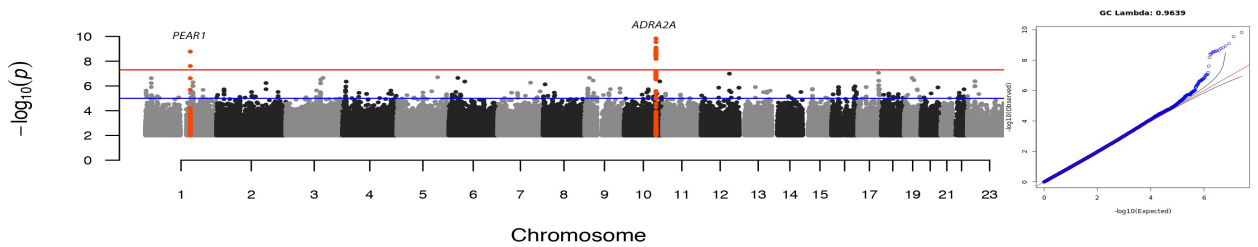

# Supplementary Figure 1 continued.

## Epinephrine low5

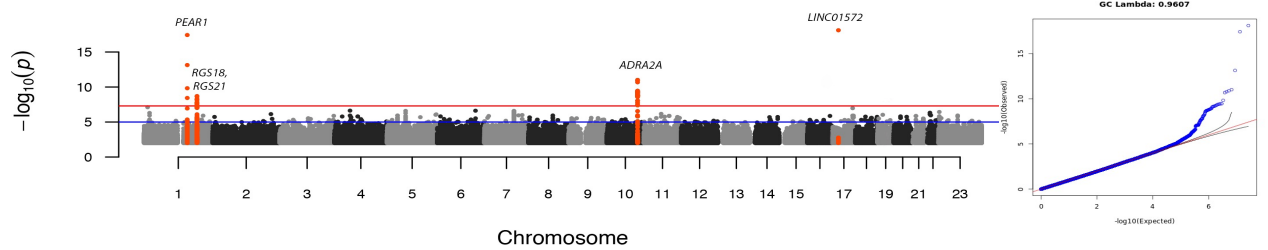

## Epinephrine high1

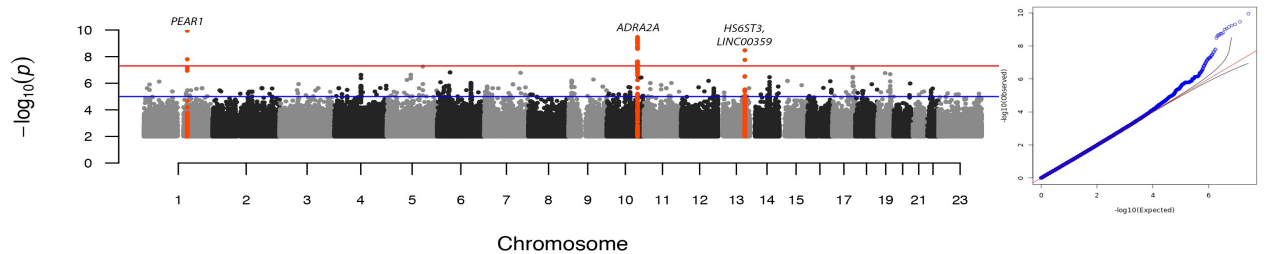

## Epinephrine high2

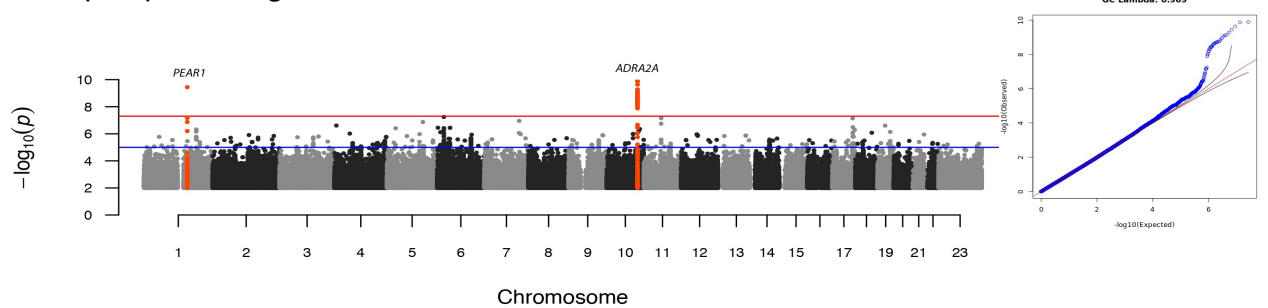

## Epinephrine high3

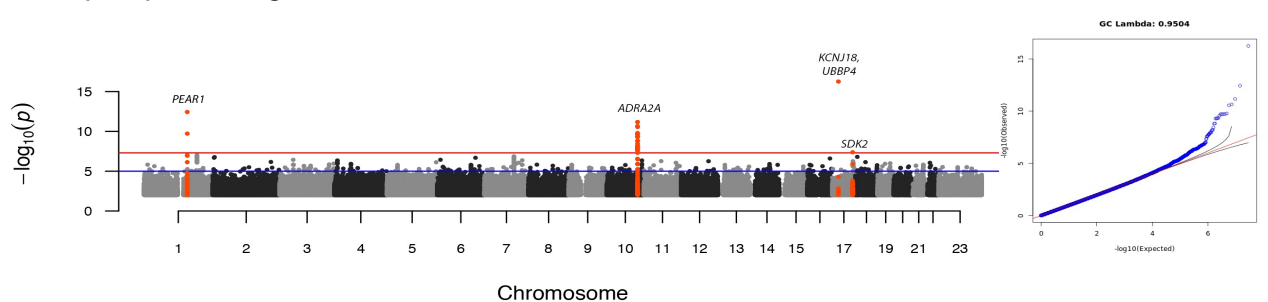

**Supplementary Figure 2A: Box plots of ADP-Induced Platelet Reactivity phenotypes for sentinel GWAS variants.**

**Supplementary Figure 2A: Association between ADP-Induced Platelet Reactivity and Genome-Wide Significant Loci using Single-Variant Approaches.** For each box plot, the horizontal line within each box indicates the median; the top and bottom borders of each box indicate the inter-quartile range. The whiskers extending from each box indicate the 95% confidence interval and individual data points are shown in red. Platelet reactivity is expressed as the inverse normalized transformations of residuals from linear models as described in the Methods section. For each polymorphism, the lowest p-value among ADP-based phenotypes is shown. P-values are from a two-sided score test with no adjustment for multiple testing from the GWAS analysis.

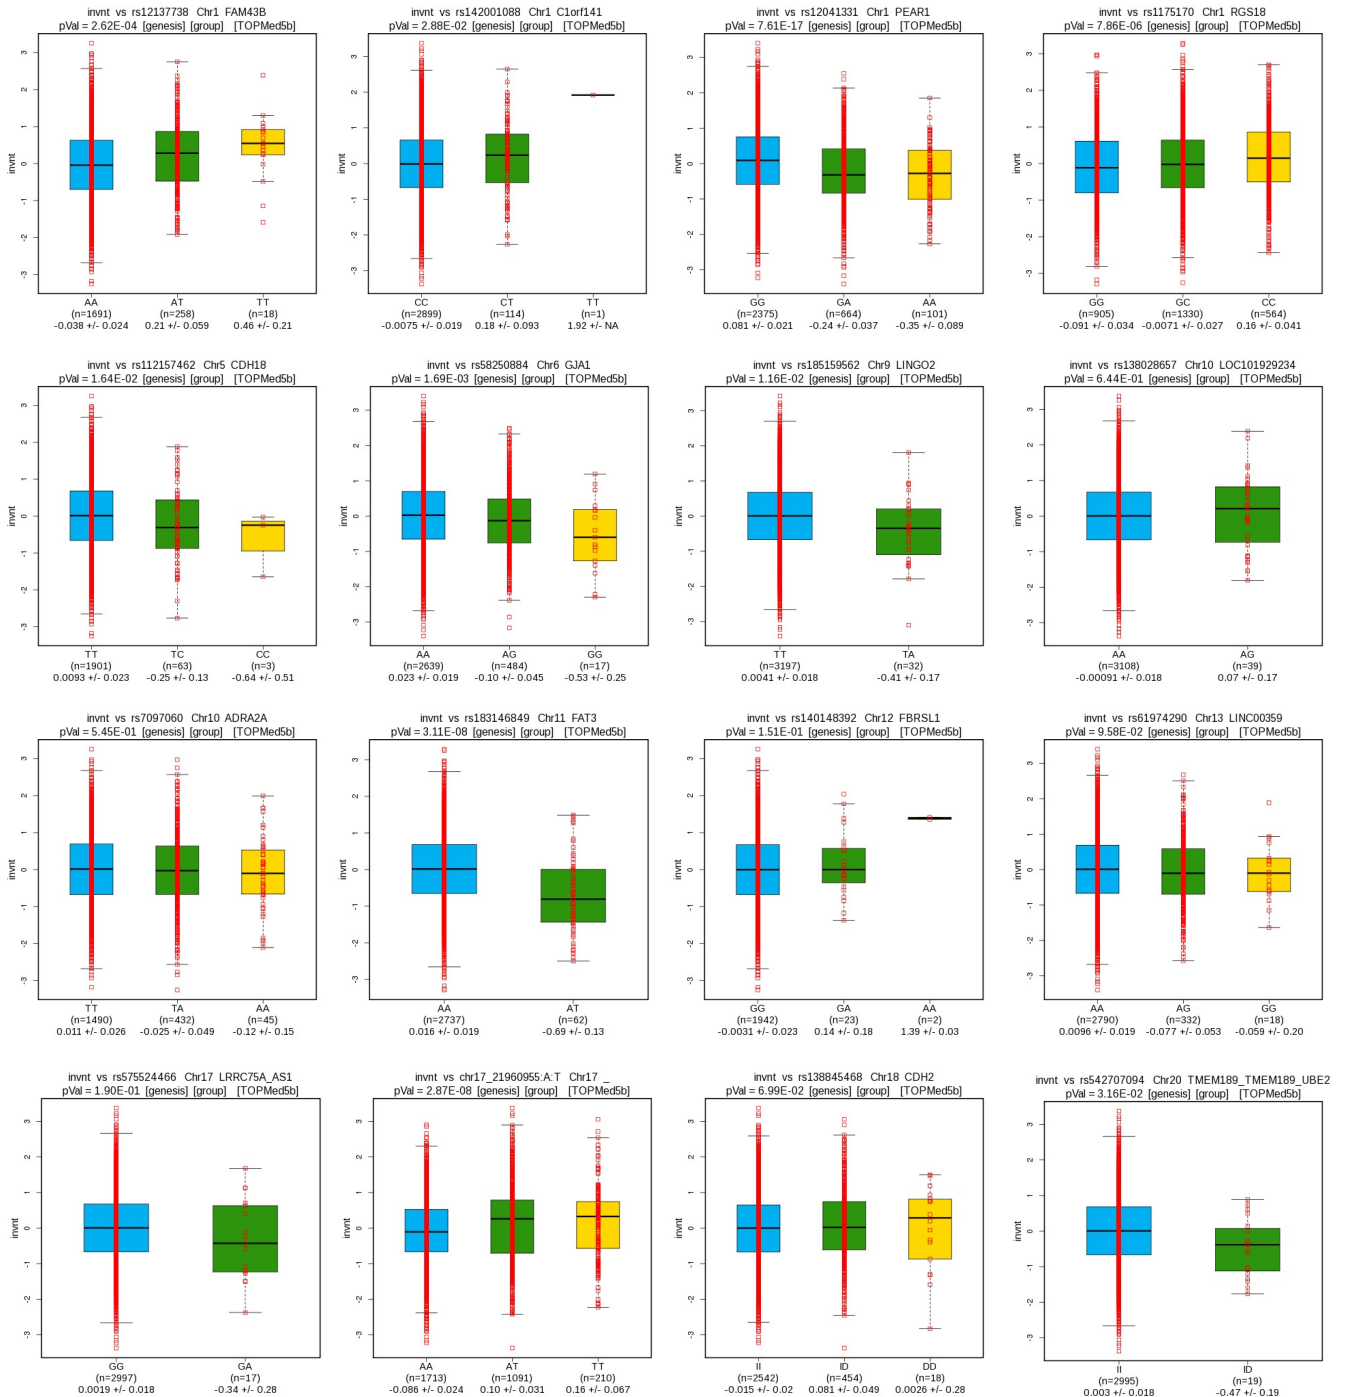



**Supplementary Figure 2B: Box plots of Collagen-Induced Platelet Reactivity phenotypes for sentinel GWAS variants.**

**Supplementary Figure 2B: Association between Collagen-Induced Platelet Reactivity and Genome-Wide Significant Loci using Single-Variant Approaches.** For each box plot, the horizontal line within each box indicates the median; the top and bottom borders of each box indicate the inter-quartile range. The whiskers extending from each box indicate the 95% confidence interval and individual data points are shown in red. Platelet reactivity is expressed as the inverse normalized transformations of residuals from linear models as described in the Methods section. For each polymorphism, the lowest p-value among collagen-based phenotypes is shown. P-values are from a two-sided score test with no adjustment for multiple testing from the GWAS analysis.

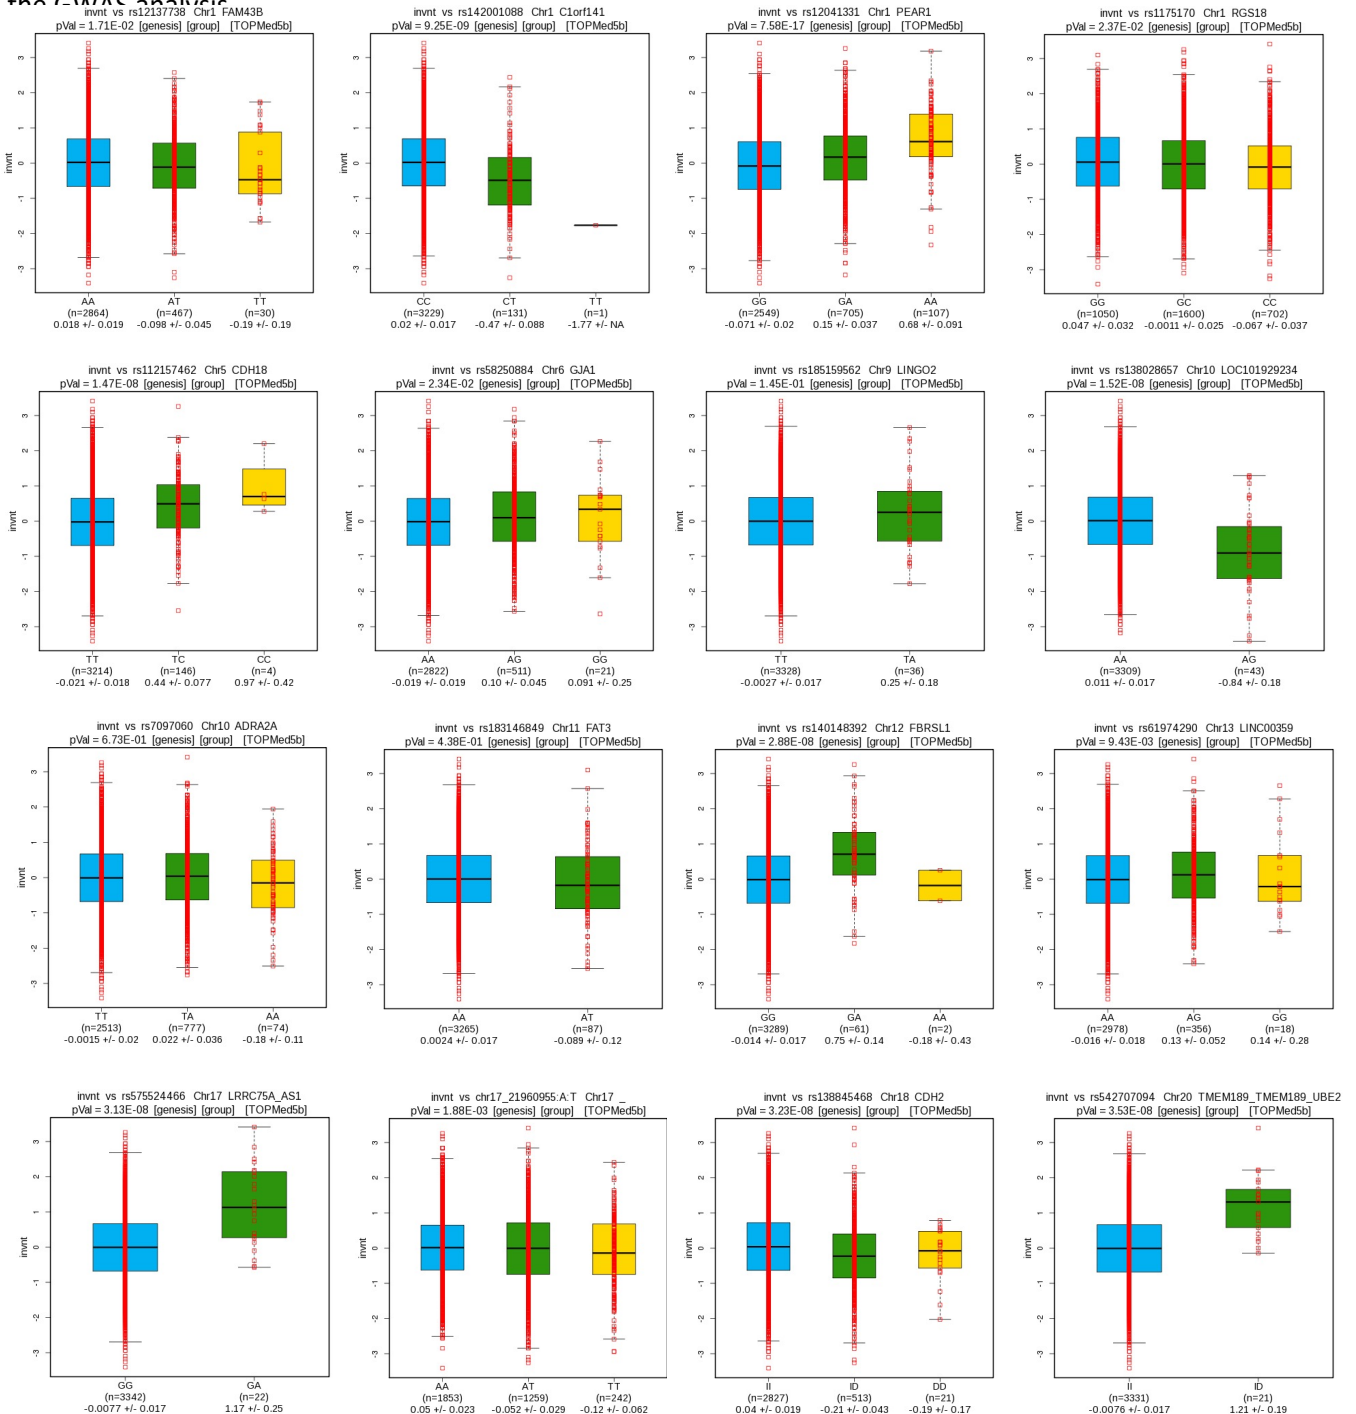

**Supplementary Figure 2C: Box plots of Epinephrine-Induced Platelet Reactivity phenotypes for sentinel GWAS variants.**

**Supplementary Figure 2C: Association between Epinephrine-Induced Platelet Reactivity and Genome-Wide Significant Loci using Single-Variant Approaches.** For each box plot, the horizontal line within each box indicates the median; the top and bottom borders of each box indicate the inter-quartile range. The whiskers extending from each box indicate the 95% confidence interval and individual data points are shown in red. Platelet reactivity is expressed as the inverse normalized transformations of residuals from linear models as described in the Methods section. For each polymorphism, the lowest p-value among epinephrine-based phenotypes is shown. P-values are from a two-sided score test with no adjustment for multiple testing from the GWAS analysis.

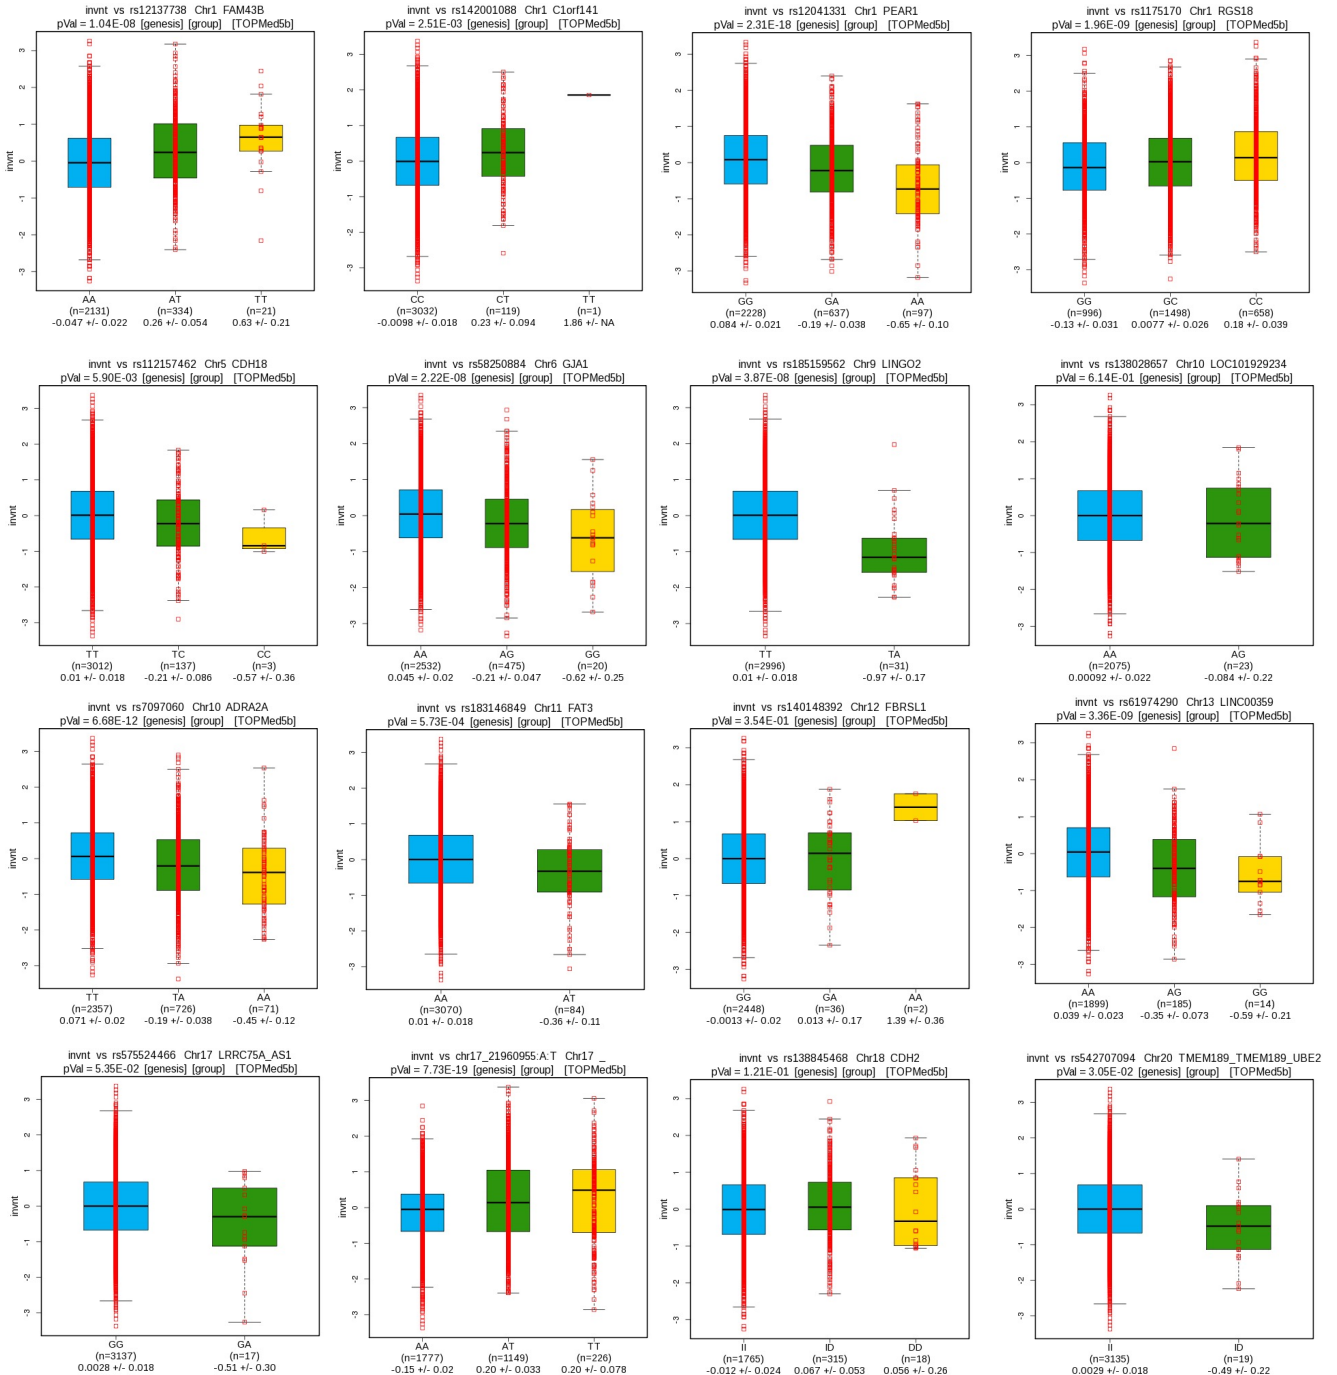

### Supplementary Figure 3. Locus zoom plots of GWAS loci associated.

**Supplementary Figure 3.** Locus zoom plots of independent loci associated with platelet aggregation in response to [A] ADP, [B] Collagen (and [C] Epinephrine. P-values are from a two-sided score test with no adjustment for multiple testing from the GWAS analysis.

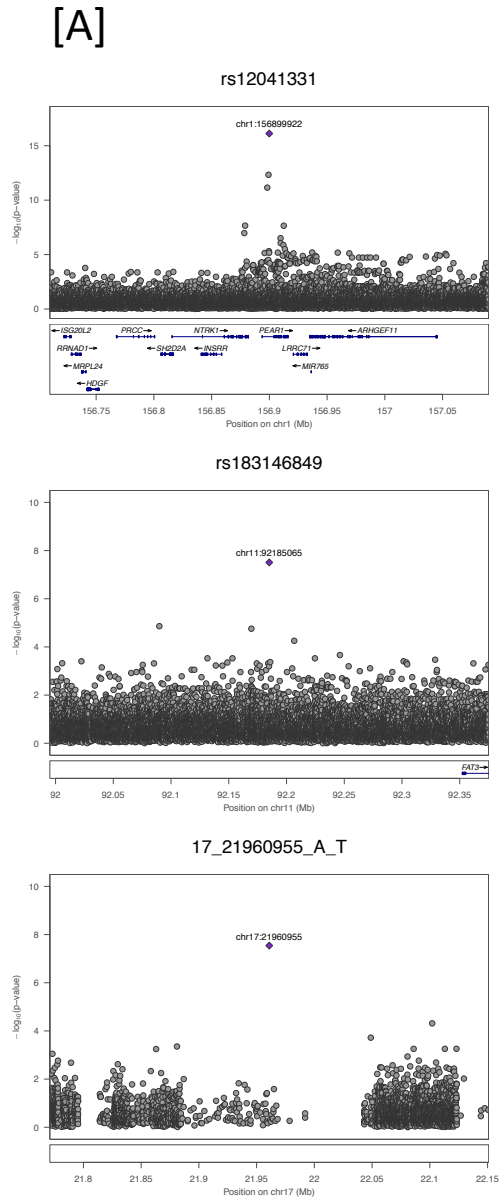

**[B]**

rs12041331

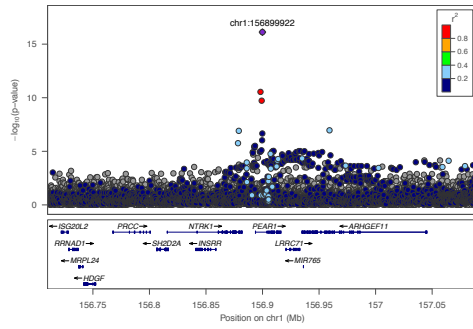

rs140148392

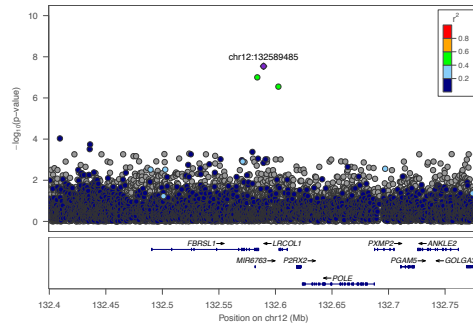

rs142001088

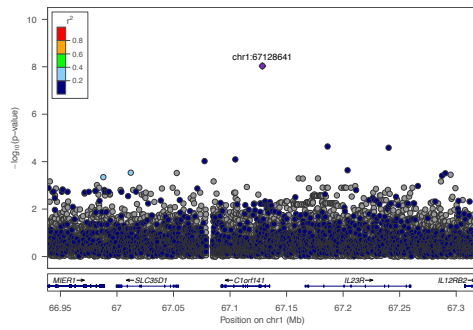

rs575524466

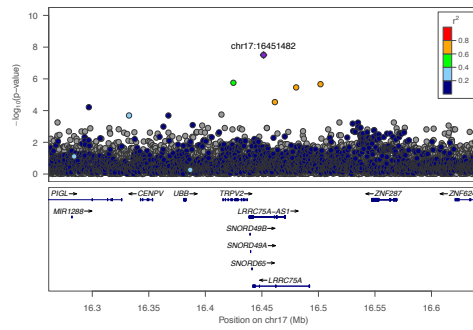

rs112157462

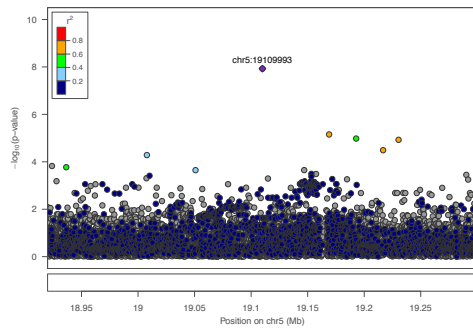

rs138845468

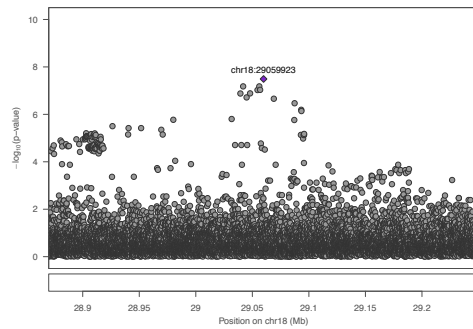

rs1075490891

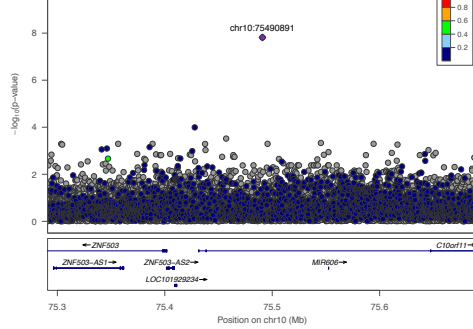

rs542707094

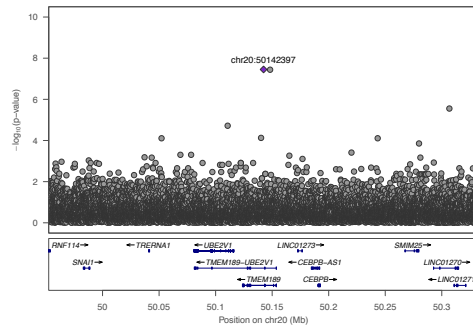

[C]

rs12137738

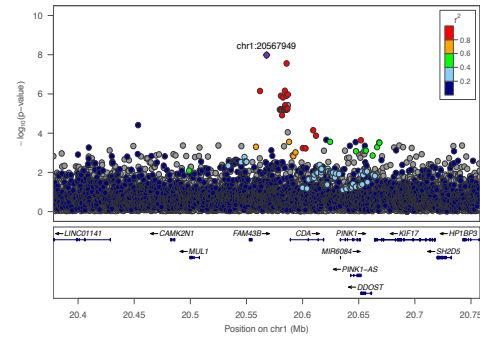

rs185159562

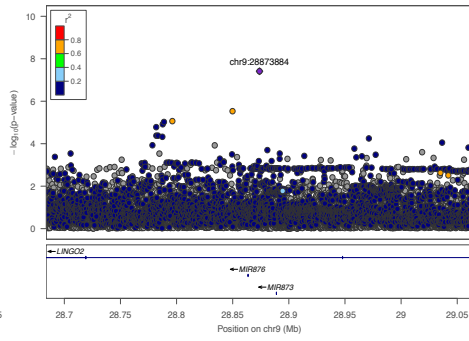

rs1030918549

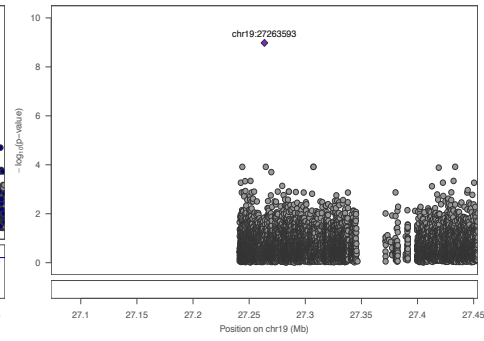

rs12041331

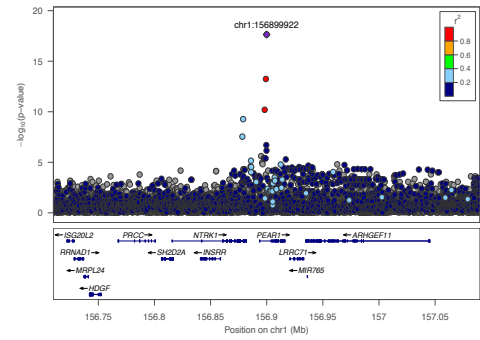

rs7097060

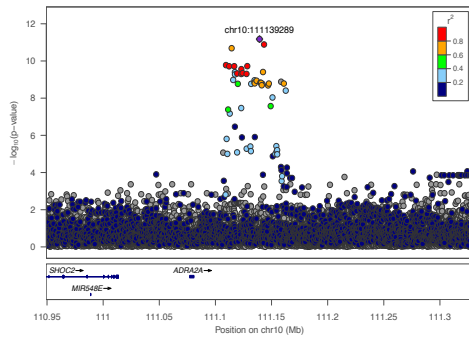

17\_21960955\_A\_T

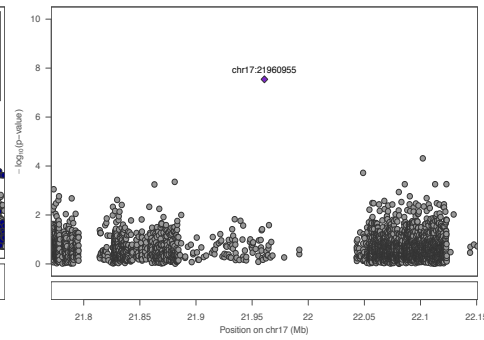

rs1175170

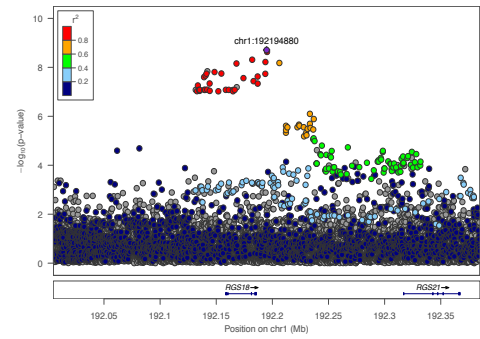

rs61974290

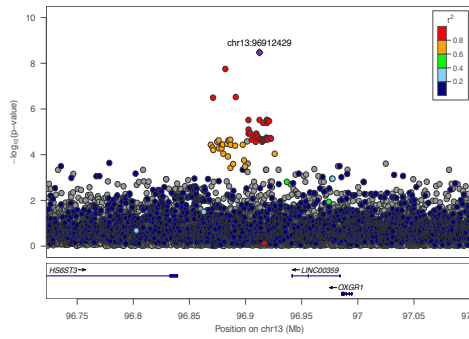

rs58250884

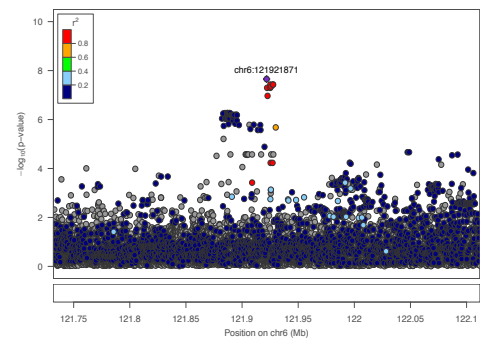

17\_21960955\_A\_T

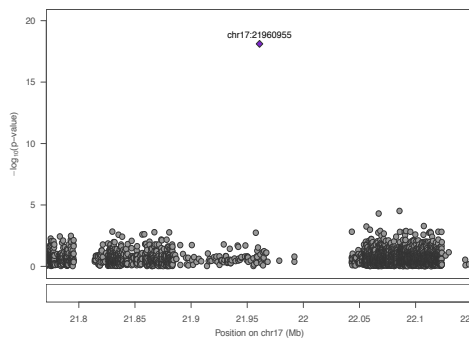

## Supplementary Figure 4: Evaluation of allele-specific enhancer activity.

**Supplementary Figure 4:** Evaluation of allele-specific enhancer activity differences via mutagenesis of top prioritized SNPs that are associated with RGS18 (rs10754003, rs6687273, rs12070423, rs4495675) ADRA2A (rs7097060), PEAR1 (rs822442) in HEK293 cells overexpressing CTCF, CEPBP, GATA1, NFE2, and FOSL1 in **[A]** and in K562 Cells in **[B]**. P-values are from a two-sided Welch test with no adjustment for multiple testing. In panel A: 6 biological replicates over 3 independent experiments were used for the GFP control, 12 biological replicates over 3 independent experiments were used for the experimental transcription factors. In panel B, 24 biological replicates over 3 independent experiments were used. Bar plots depict the mean values +/- SEM

**[A]**

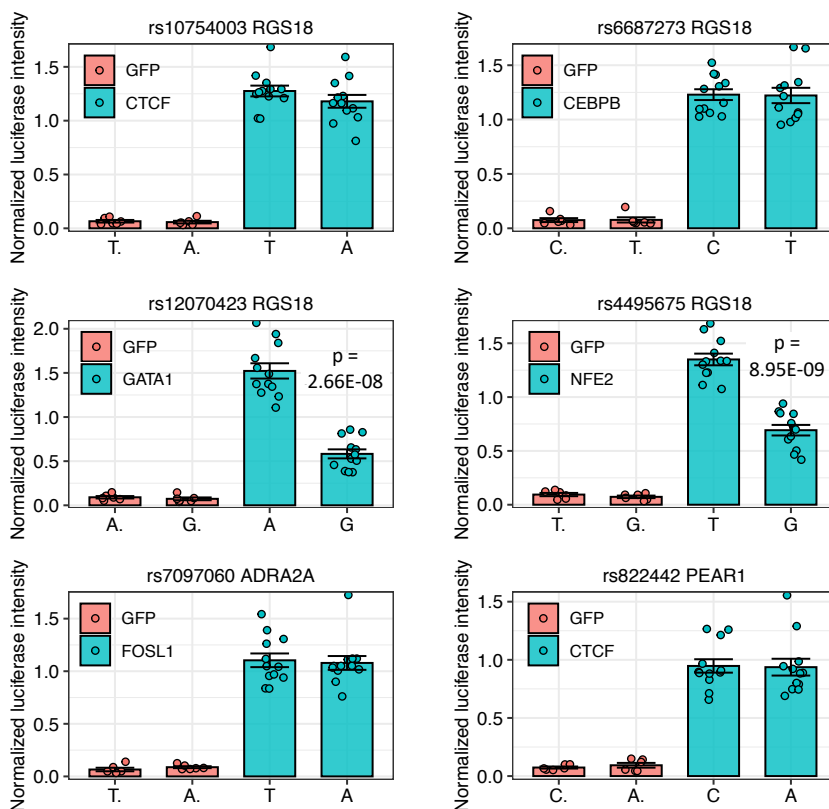

**[B]**

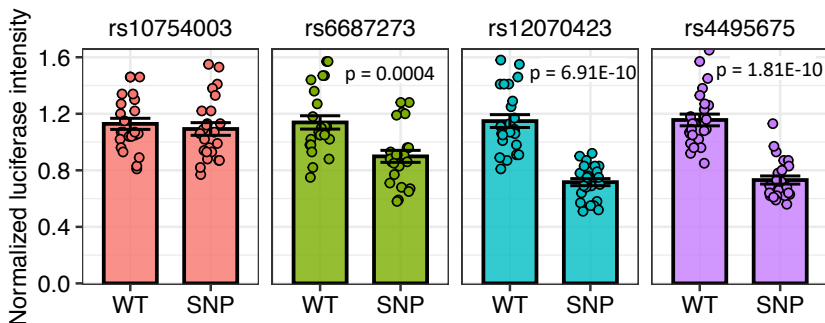

**Supplementary Figure 5:** Overexpression of various transcription factors in HEK-293 cells.

**Supplementary Figure 5:** Overexpression of various transcription factors in HEK-293 cells. HEK293 cells were transduced with lentiviral vector containing ORF of GFP (Control), POLR2A, NRF1, CTCF, FOSL1, GATA1, GATA2, CEPBP, and NFE2. Expression of various transcription factors mRNA were measured by RT-qPCR, normalized to  $\beta$ -actin.

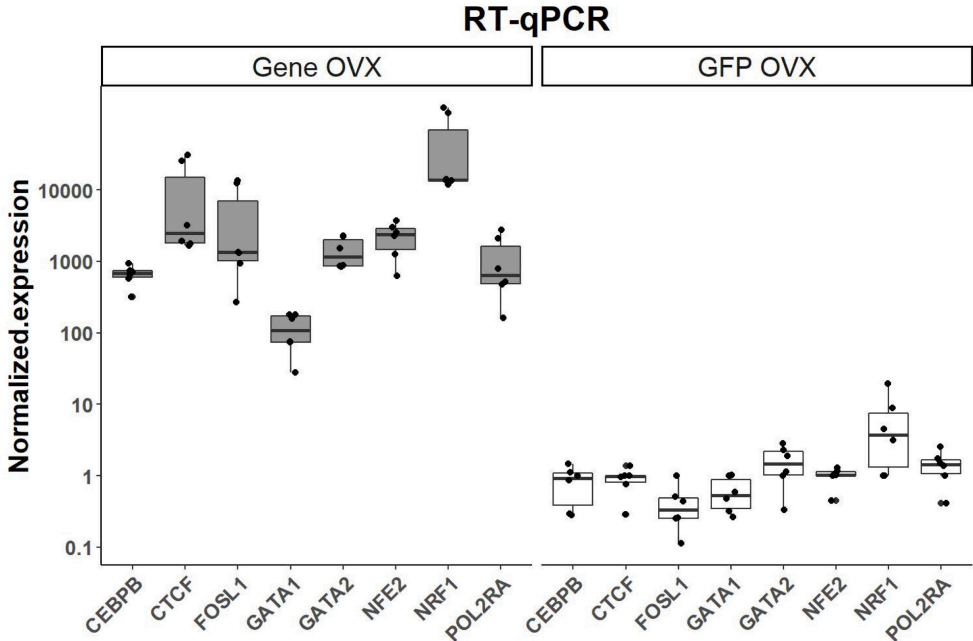



## Supplementary Figure 6: QQ plots of SKAT analyses of rare deleterious coding variants.

**Supplementary Figure 6:** QQ plots of SKAT analyses of rare deleterious coding variants with ADP, Collagen and Epinephrine induced platelet aggregation. P-values are from a two-sided score test with no adjustment for multiple testing from the SKAT analysis.

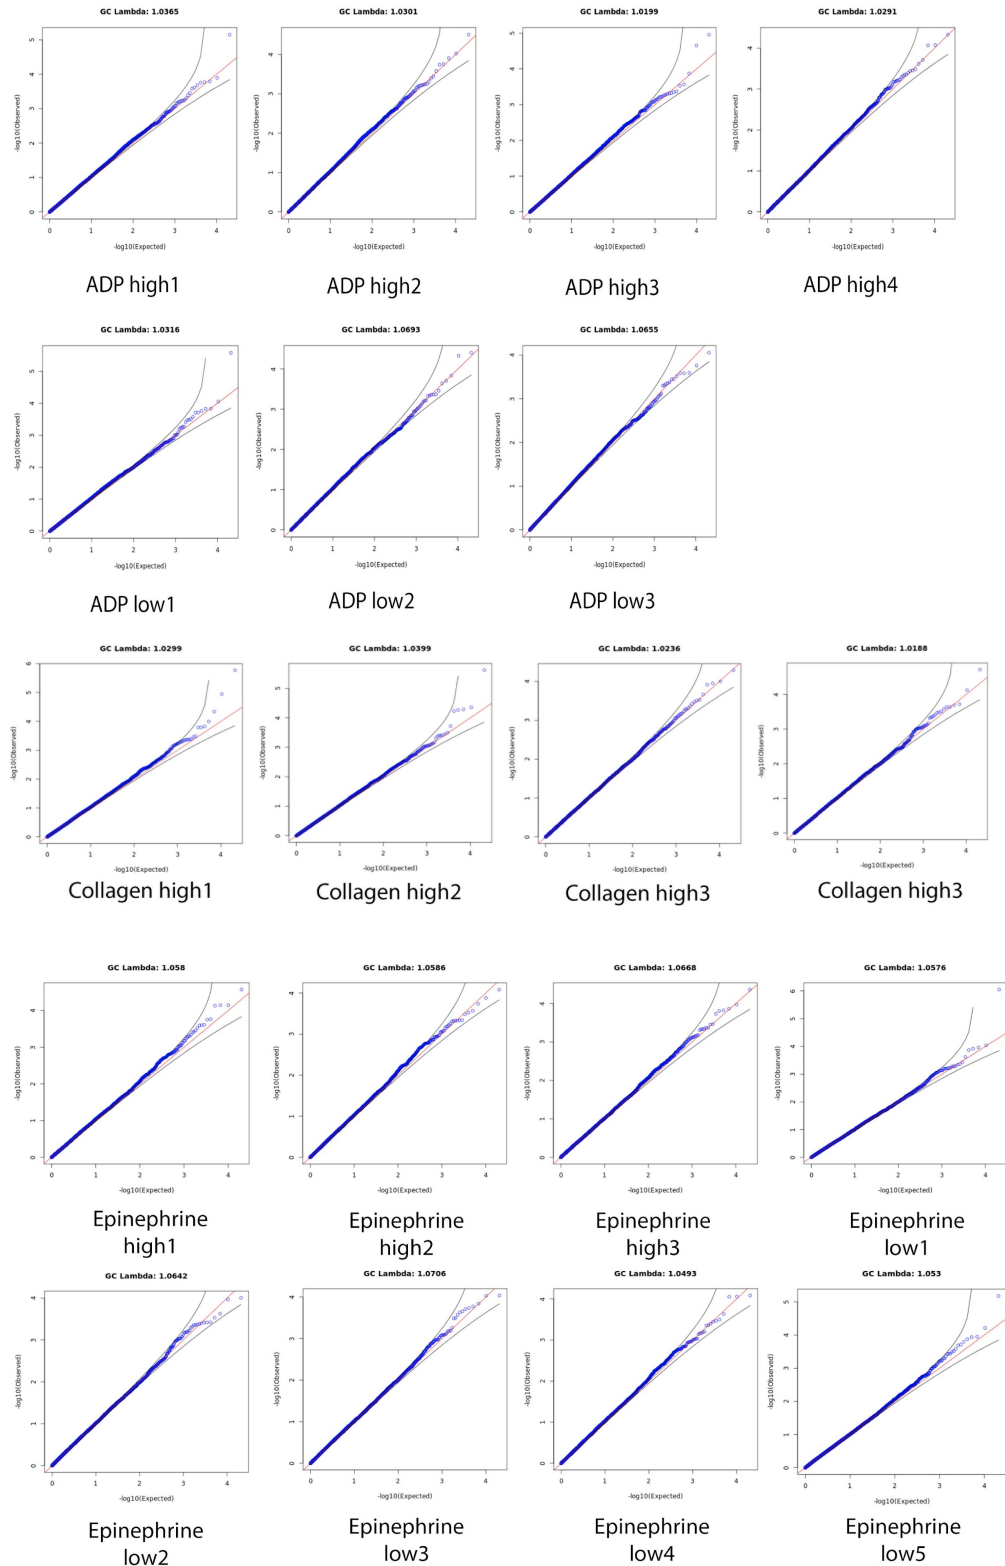



**Supplementary Figure 7: Leave-one-out technique to identify the variants contributing the most to SKAT p-value.**

**Supplementary Figure 7:** Leave-one-out technique to identify the variants contributing the most to SKAT p-value of [A] SVEP1, [B] BCO1, [C] NELFA and [D] IDH3A were associated with platelet aggregation after Bonferroni correction ( $0.05 / 17744 = 2.819 \times 10^{-6}$ ). X-axis represents the variants in the gene set, orange dots represent the  $-\log_{10}(\text{p-value})$  of gene set when the variant was left out and blue bars represent the minor allele frequency of the variants. P-values are from two-sided score tests with no adjustment for multiple testing.

[A] SVEP1,

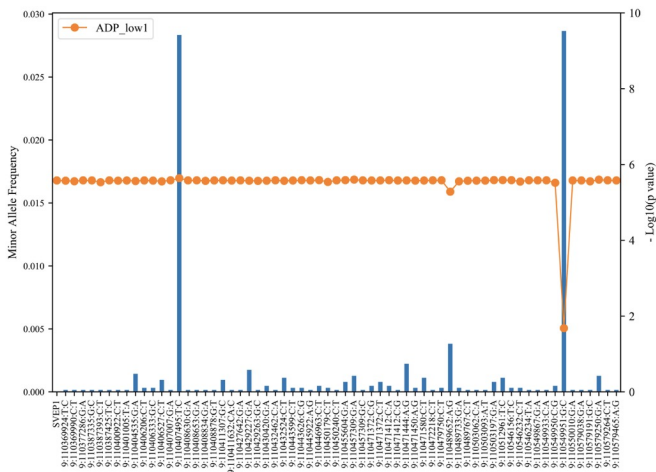

[B] BCO1,

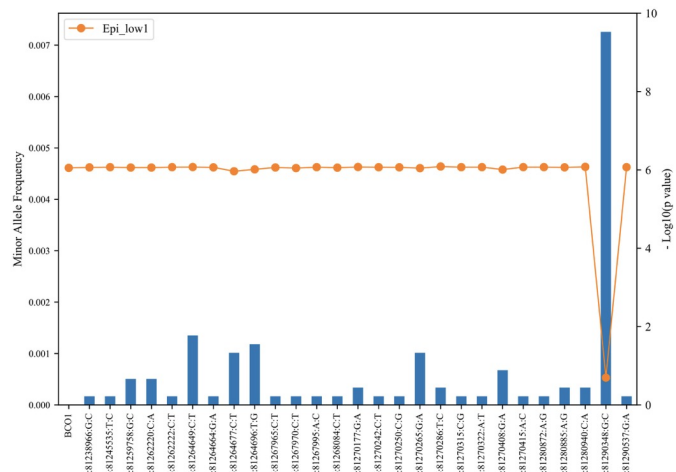

[C] NELFA

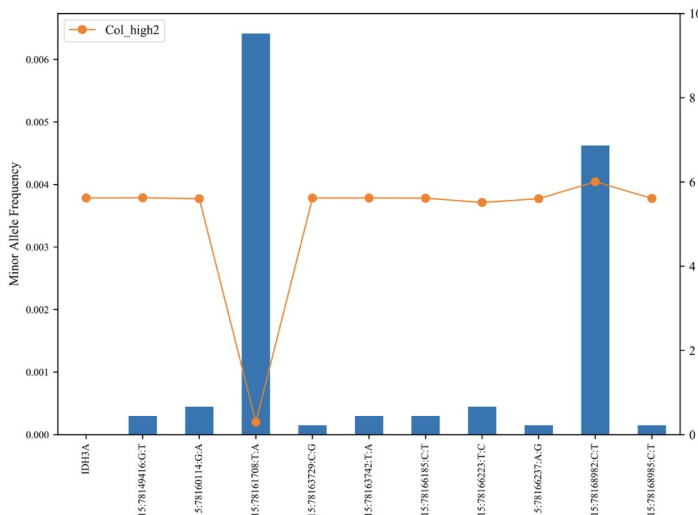

[D] IDH3A

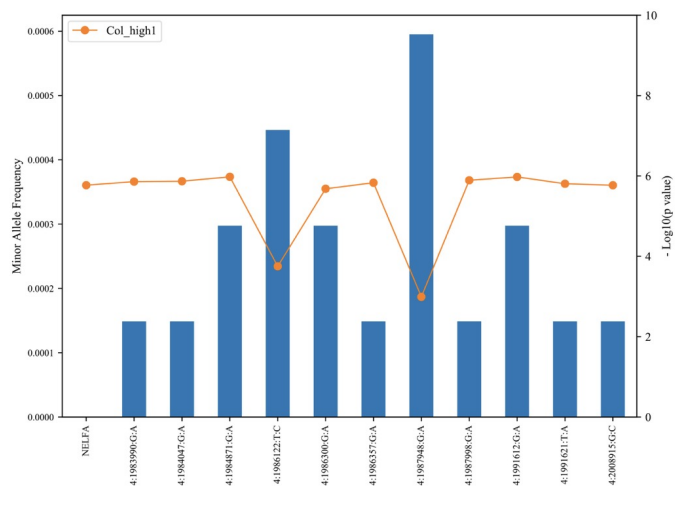

**Supplementary Figure 8: QQ plots of SKAT analyses of rare non-coding variants in megakaryocyte specific super-enhancers.**

**Supplementary Figure 8: QQ plots of SKAT analyses of rare non-coding variants in megakaryocyte specific super-enhancers with ADP, Collagen and Epinephrine induced platelet aggregation. P-values are from a two-sided score test with no adjustment for multiple testing from the SKAT analysis.**

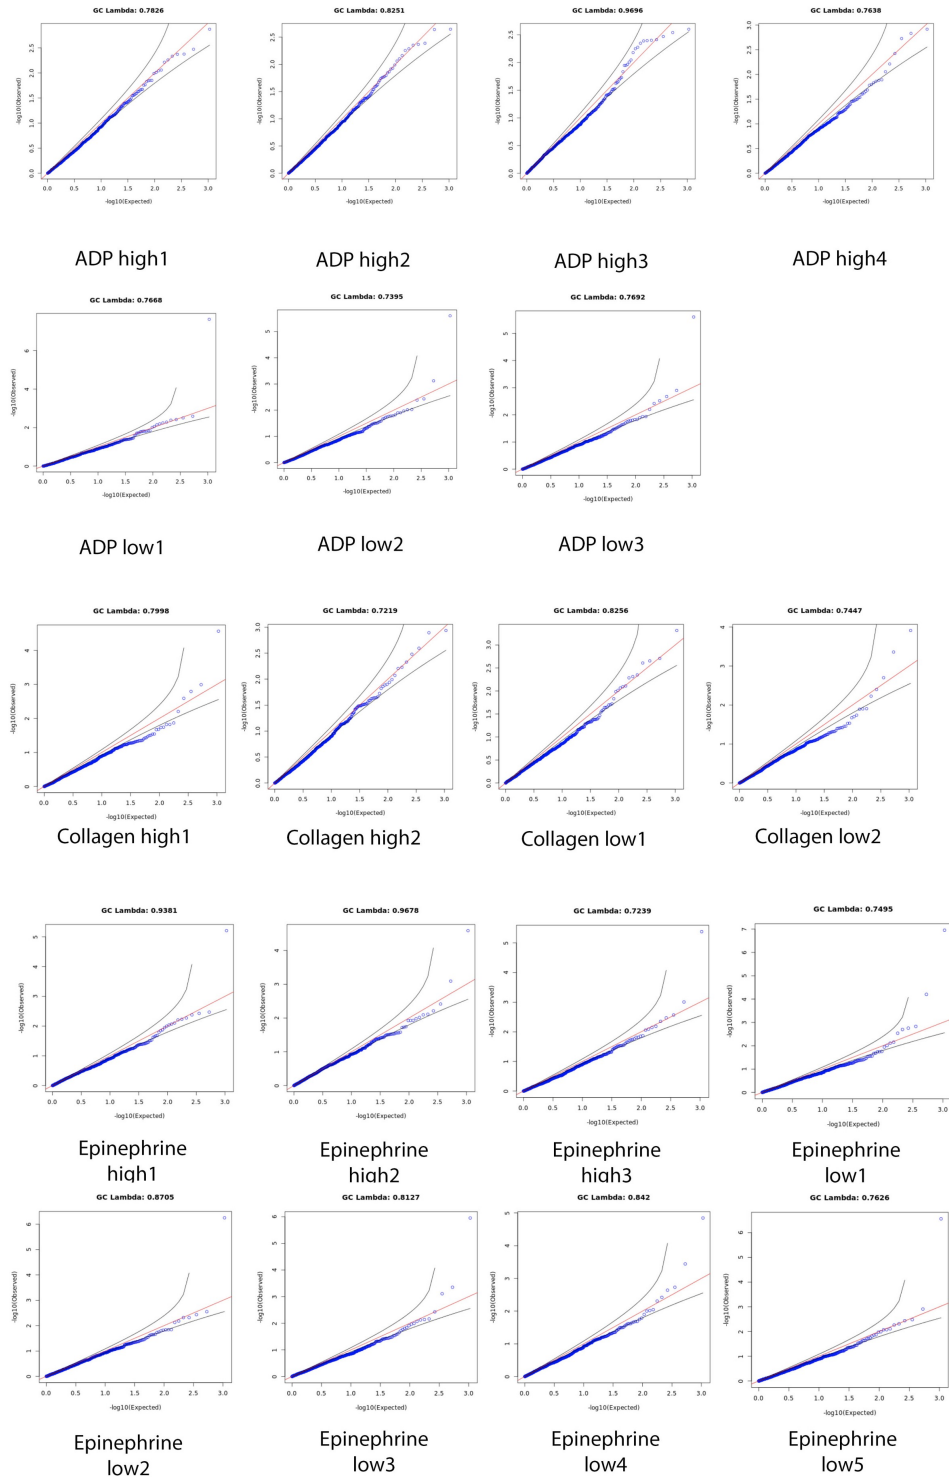

**Supplementary Figure 9:** Leave-one-out technique to identify the variants contributing the super enhancer located at *PEAR1* locus.

**Supplementary Figure 9:** Leave-one-out technique to identify the variants contributing the most to SKAT p-value of the super enhancer located at *PEAR1* locus. Blue dots represent the  $-\text{Log}_{10}(\text{p-value})$  of aggregated non-coding variants in *PEAR1* locus when the variant was left out. P-values are from two-sided score tests with no adjustment for multiple testing.

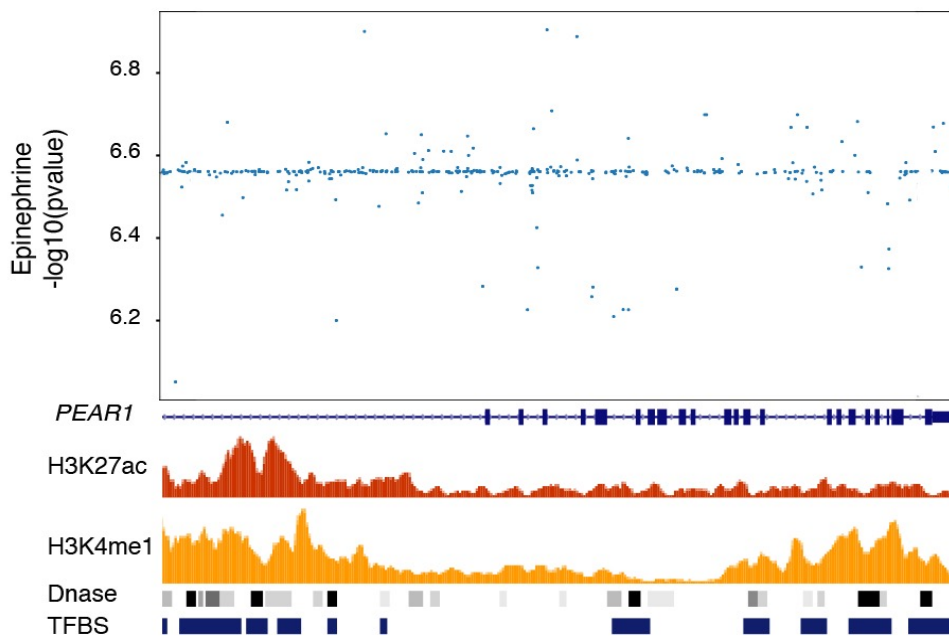

Supplement: 41467_2021_23470_MOESM1_ESM.pdf [file 41467_2021_23470_MOESM1_ESM.pdf]
